# 1 **Genome-wide identification and functional analysis of circRNAs in**

## 2 *Zea mays*

3  
4 **Baihua Tang<sup>1,2¶</sup>, Zhiqiang Hao<sup>1,2¶</sup>, Yanfeng Zhu<sup>1,2¶</sup>, Hua Zhang<sup>2</sup> and Guanglin Li<sup>1,2\*</sup>**

5  
6 <sup>1</sup>Key Laboratory of Ministry of Education for Medicinal Plant Resource and Natural  
7 Pharmaceutical Chemistry, Shaanxi Normal University, Xi'an, China, <sup>2</sup>College of Life Sciences,  
8 Shaanxi Normal University, Xi'an, China

9  
10  
11 \*Correspondence:

12 Guanglin Li

13 [glli@snnu.edu.cn](mailto:glli@snnu.edu.cn)

14 E-mail for other authors:

15 [tangbaihua@snnu.edu.cn](mailto:tangbaihua@snnu.edu.cn)

16 [haozhiqiang@snnu.edu.cn](mailto:haozhiqiang@snnu.edu.cn)

17 [xnzyf2014@163.com](mailto:xnzyf2014@163.com)

18 [zhllk@snnu.edu.cn](mailto:zhllk@snnu.edu.cn)

19  
20  
21  
22  
23  
24  
25  
26 ¶These authors contributed equally to this work

## 27 **Abstract**

28 Circular RNAs (circRNAs) are a class of endogenous noncoding RNAs, which increasingly drawn  
29 researchers' attention in recent years as their importance in regulating gene expression at the  
30 transcriptional and post-transcriptional levels. With the development of high-throughput sequencing  
31 and bioinformatics, circRNAs have been widely analysed in animals, but the understanding of  
32 characteristics and function of circRNAs is limited in plants, especially in maize. Here, 3715  
33 unique circRNAs were predicted in *Zea mays* systematically, and 8 of 12 circRNAs were validated  
34 by experiments. By analysing circRNA sequence, the events of alternative circularization  
35 phenomenon were found prevailed in maize. By comparing circRNAs in different species, it  
36 showed that part circRNAs are conserved across species, for example, there are 273 circRNAs  
37 conserved between maize and rice. Although most of the circRNAs have low expression levels, we  
38 found 213 differential expressed circRNAs responding to heat, cold, or drought, and 1782 tissue-  
39 specific expressed circRNAs. The results showed that those circRNAs may have potential  
40 biological functions in specific situations. Finally, two different methods were used to search  
41 circRNA functions, which were based on circRNAs originated from protein-coding genes and  
42 circRNAs as miRNA decoys. 346 circRNAs could act as miRNA decoys, which might modulate  
43 the effects of multiple molecular functions, including binding, catalytic activity, oxidoreductase  
44 activity, and transmembrane transporter activity. Maize circRNAs were identified, classified and  
45 characterized systematically. We also explored circRNA functions, suggesting that circRNAs are  
46 involved in multiple molecular processes and play important roles in regulating of gene expression.  
47 Our results provide a rich resource for further study of maize circRNAs.

48

49 **Keywords: *Zea mays*, CircRNAs, Identification, Function, miRNA-Decoys**

50

51

52

## 53 Introduction

54 Circular RNAs (circRNAs) are a class of endogenous noncoding RNA molecules formed by  
55 backsplicing [1-5]. Although circRNAs or circular isoforms (e.g., muscleblind gene, sodium  
56 transporter NCX1, the rat cytochrome P450 2C24 gene, ETS and the cytochrome P450 2C18 genes)  
57 have been discovered in *Drosophila*, mice, and humans many years [6-10], they have increasingly  
58 drawn researchers' attention in recent years for their important roles in regulating gene expression.

59 Unlike mRNA, circRNA transcripts usually lack of the 5' cap and 3' poly(A) tail, and the  
60 majority of circRNAs are expressed at low levels compared with linear RNAs [1, 3, 5, 11].  
61 However, some specific circRNAs have prominent expression compared to their corresponding  
62 linear isoforms, for instance, two antisense transcripts of CDR1as and cANRIL [2, 12]. Different  
63 circRNAs are often expressed in specific tissues, cell types or developmental stages [2, 5, 13, 14],  
64 and particular time courses, suggesting that circRNAs exhibit spatiotemporal-specific expression  
65 patterns [15]. Additionally, certain circRNAs showed evolutionary conservation between humans  
66 and mice [2, 3], play roles in regulating gene expression, and are often present in some diseases [12,  
67 16-19]. Intriguingly, circRNAs can act as miRNA or RNA binding protein (RBP) sponges, which  
68 sequester miRNAs away from their mRNA targets [2, 14, 20-22], for example, CDR1as and Sry as  
69 miRNA sponges [2, 23], inferring circRNA regulatory functions in the genetic network [11, 13].  
70 With development of high-throughput sequencing, the methods identifying circRNAs have been  
71 developed [1-5, 13], and a number of circRNAs have been identified in animals. However, plant  
72 circRNAs are still underappreciated with the exception of those in thale cress (*Arabidopsis*  
73 *thaliana*), rice (*Oryza sativa*), tomato (*Solanum lycopersicum*), barley (*Hordeum vulgare*), maize  
74 (*Zea mays L.*) and trifoliate orange (*Poncirus trifoliata L. Raf.*) [11, 15, 24-30].

75 Maize (*Zea mays L.*) is one of the most important crops worldwide and serves as model  
76 organism in biological research. With the development of high-throughput sequencing technology,  
77 more and more data have been produced, now it is possible for us to study circRNAs in maize  
78 systematically. In this article, maize circRNAs were firstly identified from multiple resources. Then

79 circRNA characteristics, such as genomic distribution, alternative circularization, conservation and  
80 expression patterns, were analyzed. Whether CircRNAs act as miRNA decoys to mediate the  
81 regulation of gene expression in maize or not were analysed. Finally, maize circRNA functions  
82 were inferred in our study. The discovery of maize circRNAs enriches the repositories of plant  
83 circRNAs.

84

## 85 **Results**

### 86 **Identification and Classification of maize circRNAs**

87 In order to identify circRNAs in *Zea mays*, transcriptome data were firstly collected from 5  
88 resources (Table 1), then find\_circ, one of methods widely used in circRNA prediction [2], was  
89 carried out for the genome-wide identification of circRNAs (S1 Fig), finally we predicted 7011  
90 circRNAs totally. After merging the circRNAs with same loci, 3715 unique circRNAs candidates  
91 were used for further analysis (S1 Table).

92 All predicted circRNAs can be classified into three different groups based on positional  
93 relationship between the circRNA and their related gene: "circRNAs within genes", "circRNAs  
94 overlap with genes" and "intergenic circRNAs", with proportions of 47.6%, 19.7%, and 32.7%,  
95 respectively (S1 Table). In addition, based on the positional relationship between the circRNA and  
96 their related exons, circRNAs can be divided into exonic circRNAs (ecircRNAs) and non-  
97 ecircRNAs. In maize circRNAs, there are 2007 ecircRNAs, the backsplice sites of which are  
98 located in the CDS-CDS, CDS-3' UTR, CDS-5' UTR, 3' UTR-3' UTR, 3' UTR-5' UTR, and 5' UTR-  
99 5' UTR. EcircRNAs account for 54% of the total circRNAs, which constitute the main part of the  
100 circRNAs (Fig 1A).

101

### 102 **Characteristics of circRNAs in maize**

103 When comparing numbers of circRNAs with backsplice sites located in different regions (Fig 1A),  
104 we found more circRNAs at 3' UTR-3' UTR than at 5' UTR-5' UTR, and the same case happened

105 between CDS-3' UTR and CDS-5' UTR. The results showed that circRNAs are more frequency in 3'  
106 UTR than in 5' UTR. Interestingly, some circRNAs also found in introns. The un-random  
107 distributions of circRNAs in genome suggest that they have biological functions. Majority of  
108 circRNAs contained 1 to 4 exons less than their corresponding parent genes, most of which had  
109 more than 6 exons (Fig 1B). Likewise, the comparison of transcript lengths between the circRNAs  
110 and their parent genes displayed circRNAs with shorter lengths ( $P < 2.2e-16$ , Wilcoxon rank-sum  
111 test) (Fig 1C). The two results are in accordance with previous reports [15, 25]. Interestingly,  
112 circularized exons from single exon circRNAs have a slightly longer length than exons from  
113 circRNAs with multiple circularized exons (Fig 1D), suggesting that longer exons may facilitate  
114 circularization [3, 31, 32].

115 The intron length distributions were also compared between the exonic circRNAs and linear  
116 genes. We found that introns flanking circularized exon were significantly longer than that of the  
117 linear genes ( $P < 2.2e-16$ , Wilcoxon rank sum test) (Fig 2A), as was demonstrated in previous  
118 studies [1, 3, 15, 33, 34]. This observation suggests that longer flanking introns may promote exon  
119 circularization. However, determining whether the existence of these structures is necessary for  
120 circRNA formation requires further investigation.

121 Because different forms of linear mRNAs are produced during the alternative splicing (AS)  
122 process in *Z. mays* [35], we hypothesized that alternative circularization (multiple circRNAs  
123 produced from one gene) happened on circRNAs. Based on our results, 905 exon circularization  
124 events from 237 parent genes were discovered, with two circRNA isoforms from one gene making  
125 up larger proportion (54.0%), three different circRNAs accounting for 18.1%, four for 8.0%, five  
126 for 5.5%, and the rest of the genes possessed at least six circRNAs (Fig 2B and S2 Table). Among  
127 these alternative circularization events, one parent gene possessed the most 32 circRNAs based on  
128 annotated information. Examples of alternative circularization are shown in S2A Fig. Obviously,  
129 circRNAs comprise single or multiple exons with or without known exon boundaries from the same  
130 gene. Most circRNAs (1431/1768) used new exon boundary, only 90 circRNAs had two annotated

131 exon boundaries, and 247 circRNAs with one known boundary (S2 Table). As a result, ubiquitous  
132 alternative circularization increased the complexity of circRNAs in *Z. mays*.

### 133 134 **Conservation of circRNAs between maize and other species**

135 To evaluate circRNA conservation among different species, we firstly compared circRNAs in *Z.*  
136 *mays* with circRNAs in *O. Sativa* and *A. thaliana* [15]. 291 orthologous gene pairs were found in  
137 parent genes of circRNA, and a total of 232 circRNAs were found conserved between *Z. mays* and  
138 *O. sativa* (Fig 2C and S3A Table), which comprised 14.5% circRNAs parent genes in *Z. mays*  
139 higher than the proportion in *O. sativa* (12.2%) in a previous publication [15]. For parent genes in *Z.*  
140 *mays* and *A. thaliana*, 109 orthologous gene pairs were found, and a total of 122 circRNAs were  
141 conserved between *Z. mays* and *A. Thaliana*. In addition, the ratio of orthologous genes to the total  
142 parent genes (10.9%) in *Z. mays* was slightly lower than that in *A. thaliana* (14.5%) [15] (S2B Fig  
143 and S3B Table). When merging the conservation information of maize circRNAs in the above two  
144 parts, totally 307 conserved maize circRNAs can be identified, in which 47 circRNAs are conserved  
145 among maize, rice and arabidopsis. In addition, when comparing maize circRNAs with published  
146 circRNAs from tomato and soybean, 115 and 149 maize circRNAs are conserved, respectively  
147 (S3C and S3D Table).

### 148 149 **Validation of circular RNAs in maize**

150 To confirm our identification of maize circRNAs, twelve randomly selected circRNAs from the  
151 highly expressed maize circRNAs were used in experimental validation. Divergent primers (S4  
152 Table) were firstly designed for each circRNA, then reverse transcription PCR were used to amplify  
153 both cDNA and genomic DNA, respectively. Theoretically, it was expected that positive and  
154 negative results of amplification would be obtained for cDNA and genomic DNA, respectively. As  
155 a control, convergent primers were also designed for each circRNA and used to amplify the linear  
156 mRNAs in verification. The amplified PCR products using divergent primers were sequenced to

157 confirm the presence of the back spliced junctions of circRNAs. As a result, 8 of the 12 circRNAs  
158 were validated (Fig 3).

159

## 160 **Expression pattern of maize circRNAs**

161 Twenty-one samples were used to measure the expression abundance of the circular RNAs. The  
162 result of two different measurements both showed that expression levels of maize circRNAs were  
163 primarily concentrated in 0-0.5 ratio or RPM bin (Fig 4A and S3 Fig). Apparently, the quantitative  
164 distribution of circRNAs in the various intervals was more dispersed than the distribution of their  
165 parent genes (Fig 4A and S3 Fig). Interestingly, the number of circRNAs with outstanding  
166 expression level in the sample of heat was more than other conditions (Fig 4B). Additionally, the  
167 Pearson correlation coefficient values were calculated to examine whether the circRNAs were  
168 capable of regulating the expression of their parent genes as reported in animals [36, 37]. We found  
169 791 significantly positively correlated pairs and 2 significantly negatively correlated pairs amongst  
170 1818 total pairs of circRNAs and their parent genes ( $P < 0.05$ ), suggesting their correlation for gene  
171 expression regulation (S5 Table).

172 To investigate whether circRNAs have tissue/developmental stage-specific expression patterns  
173 [2, 13], transcriptome data from 10 tissues containing 21 samples were used to calculate the tissue-  
174 specific expression levels. The results showed that half of the circRNAs possessed tissue-specific  
175 expression characteristics with a tissue-specific index greater than 0.9. The number of these  
176 circRNAs (1782) with tissue-specific expression was similar in all tissues with the exception of the  
177 embryo sac (Fig 4C and S3C Fig). Most circRNAs (1537) were expressed in single tissue, although  
178 a few circRNAs (13) were commonly expressed in all 10 tissues. The tissue-specific expression  
179 patterns of the circRNAs indicated that they might have specific spatial functions.

180 To examine the differential expression levels of the circRNAs, we compared the expression  
181 profiles of circRNAs and genes under control and stress conditions in the different transcriptome  
182 data groups. We found that 213 circRNAs were differentially expressed, of which 132 and 117 were

183 up-regulated and down-regulated under heat or cold in seedling, and under drought in stem, leaf, or  
184 root, respectively (Table 2). CircRNAs were inclined to be up-regulated or down-regulated with  
185 their parent genes simultaneously, except few circRNAs with reverse patterns comparing with their  
186 parent genes (Fig 4D and S3 Fig).

187

## 188 **Possible functions of circRNAs**

### 189 **Function of circRNAs originated from protein-coding genes**

190 As circRNAs have similar or reverse expression pattern with their parent protein-coding genes, we  
191 first performed an enrichment analysis for their parent genes to indirectly infer circRNAs' roles in  
192 maize. We found that 1821 of 3715 circRNAs enriched in 1127 parent genes. The GO enrichment  
193 analysis showed that parent genes of these circRNAs were primarily associated with cytoplasm or  
194 cytoplasmic parts and two other cellular components (plastid and thylakoid). They are also involved  
195 in most of molecular functions including catalytic activity, different enzyme activities (lyase,  
196 transferase and methyltransferase) and binding to unfolded proteins and ions. In addition, the parent  
197 genes were associated with diverse biological processes, such as response to stress, photosynthesis,  
198 and protein folding (S4 Fig). The KEGG results further showed that circRNAs' parent genes were  
199 primarily related to the metabolism of some biomacromolecules (purine metabolism, porphyrin and  
200 chlorophyll metabolism, starch and sucrose metabolism, *etc*), amino acids and cell respiration  
201 (glycolysis and citrate cycle) (S6 Table).

202

### 203 **circRNAs acting as miRNA decoys**

204 In order to investigate the function of circRNAs as miRNA decoys in maize, we firstly identified  
205 346 circRNAs which can act as miRNA decoys based on previous methods [38, 39]. Then genome-  
206 wide miRNA-circRNA-mRNA networks were constructed to investigate the functions of circRNAs  
207 acting as miRNA decoys. The networks were composed of 5269 nodes and 6861 edges; the nodes  
208 included 144 miRNAs, 346 circRNAs and 4779 mRNAs (S4 Fig). There were 1314 interactions



209 between these 144 miRNAs and 346 circRNAs acting as miRNA decoys (Fig 5A and S7 Table).  
210 We found that the majority of subnets are interconnected in the global regulatory networks (Fig 5B).  
211 Interestingly, there were no separate sub-networks between the circRNAs and miRNAs in the  
212 miRNA-circRNA-mRNA networks as described above (S4 Fig).

213 Based on the ceRNA hypothesis [40], the function of circRNAs acting as miRNA decoys can be  
214 inferred from mRNAs which are in the same subnets with circRNAs. Totally we inferred the  
215 functions of 346 circRNAs via 4779 mRNAs (Fig 6). The GO enrichment and functional analysis of  
216 the mRNAs suggested that these 346 circRNAs might participate in diverse biological processes,  
217 such as multiple metabolic processes, cellular processes, and single organism processes. These  
218 circRNAs could also be involved in the formation of cells or cell parts, cytoplasm or cytoplasmic  
219 parts, intracellular or intracellular parts and some organelles. Moreover, these circRNAs might  
220 modulate the effects of multiple molecular functions, including binding, catalytic activity,  
221 oxidoreductase activity, and transmembrane transporter activity. Consequently, circRNAs may play  
222 significant roles in various cell locations, metabolic processes, and stress responses (S8 Table).  
223 Several pathways about energy metabolism were found, like carbon fixation pathways (25  
224 circRNAs with 7 parent genes, p-value < 0.05), nitrogen metabolism (11 circRNAs with 3 parent  
225 genes, p-value < 0.05), starch and sucrose metabolism (22 circRNAs with 17 parent genes, p-value  
226 = 0.055) and photosynthesis (1 circRNA with 1 parent gene, p-value = 0.018), showing that  
227 circRNAs play important roles in plant yield (S6B Table).

228

## 229 **Discussion**

230 At present, the exploration of circRNA is particularly scarce in plants compared to animals. To date,  
231 circRNAs studies in plant species have been confined to several model plants. In this article, 3715  
232 unique circRNAs were identified systematically, which can be classified into three different groups.  
233 Then the functional analysis of circRNAs was conducted and our results provide a basis for  
234 subsequent researches.

235

236 **Complementary sequences and inverted repeat pairs are not the main driving force**  
237 **underlying backsplicing of circRNAs**

238 In animals the driving force underlying backsplicing of circRNAs was complementary sequences or  
239 repetitive sequences in the introns flanking back-spliced exons that form double-stranded RNA  
240 structures to bring the splice sites adjacent to one another [23, 31, 41-43]. However, it is not clear  
241 whether the intron pairing was also the predominant driving force for circRNA formation in plant.  
242 Comparing the intron length distributions of circRNAs with that of linear gene, we found that  
243 longer introns maybe involved in the formation of circRNAs in maize, which were also found in  
244 tomato (S5 Fig). So this feature of longer introns flanking circularized exons found in maize,  
245 tomato, rice and thale cress maybe a common feature of plant circRNAs [15]. In addition, a total of  
246 0, 1, 3, 4, and 7 complementary sequences were present in the 20 nt, 50 nt, 100 nt, 200 nt and 500 nt  
247 bins of introns flanking circularized exons in maize, respectively (S9 Table). The max percentage of  
248 complementary sequences in introns was 0.19% for the total 3715 circRNAs. A total of 55.6% of  
249 the complemented sequences had short lengths less than 100 nt, and the longest length was 472 nt  
250 (S9 Table). The alignment of the intronic sequences to the repetitive sequences showed that only 14  
251 out of 3715 circRNAs overlapped with annotated elements in the 500 bp intronic regions. However,  
252 of the 7 circRNAs with reverse complements in the 500 bp region, 2 possessed repeats that were  
253 detected only in the downstream region (i.e., with no pairing ability) (S5 Fig). In conclusion, only  
254 handful of complementary sequences and inverted repeat pairs detected in the intron flanking  
255 circRNAs, which markedly differed from the results obtained in animals and suggested that other  
256 factors or driving forces were likely to be involved in the formation of circRNAs.

257

258 **The potential function of circRNAs**

259 To date, the functions of circRNAs are largely unknown. By using our developed methods, the  
260 function of circRNAs can be inferred. To investigate whether circRNAs acted as miRNA decoys in

261 maize, the method used in our previous reports was used to identify circRNAs as miRNA decoys  
262 [39]. Overall, 346 unique circRNAs out of 2007 exonic circRNAs were potential decoys for 144  
263 unique miRNAs. Interestingly, when compared circRNAs as miRNA decoys with our previous  
264 results (lincRNAs as miRNAs decoys) [39], we found that the ratio of circRNAs as miRNA decoys  
265 was higher than that of lincRNAs as miRNA decoys, which may imply their different roles in  
266 regulating gene expression.

267 In addition, the function of circRNAs was further predicted based on the ceRNA hypothesis and  
268 GO analysis. By comparing the potential function of the circRNAs from the parent gene and acting  
269 as miRNA decoys, the GO items (53) of the circRNAs as miRNA decoys more than the items (14)  
270 of circRNAs from the parent gene. But the functional prediction results of circRNAs from this two  
271 parts were consistent in several aspects, such as components of cytoplasmic, catalytic and binding  
272 activity, response to stress and intracellular metabolic processes. Several pathway refer to energy  
273 transformation (carbon fixation pathways, starch and sucrose metabolism, nitrogen metabolism,  
274 and photosynthesis) suggests circRNAs may contribute to crop products. Therefore, these results  
275 further prove that circRNAs could participate in a variety of biological processes, constitute  
276 different cell components and exert a variety of molecular functions.

277 Although the results of circRNAs' functional prediction and expression profiling in this paper  
278 show that maize circRNAs may be involved in a variety of metabolic processes and stresses in  
279 plants, the function of plant circRNAs need to be further validated.

280

## 281 **Conclusions**

282 This study found 3715 unique circRNAs in maize across different experiments by employing a  
283 computational pipeline for the genome-wide identification of circRNAs. Furthermore, the property  
284 of circRNAs, patterns of differential expression and tissue-specific expression are investigated.  
285 Finally, possible functions of circRNAs are inferred by two different methods. Our method and  
286 results provide an in-depth analysis of maize circRNAs and can be expanded to more plant species.

287 In addition, future experimental studies are required to elucidate the mechanisms and functions of  
288 circRNAs in plants.

289

## 290 **Materials and Methods**

### 291 **Data sets**

292 The *Zea mays* genomes and gene annotation files were downloaded from Phytozome v9.0  
293 (<http://phytozome.jgi.doe.gov/pz/portal.html>). Transcriptome data were downloaded from NCBI  
294 under accession number SRP006965 (containing embryo sac, ovule, mature pollen, and seedling),  
295 SRP011480 (only the B73 line for unpollinated ear tip, seedling shoot, immature tassel, and  
296 seedling root), SRP041183 (presenting the transcriptome of *Z. mays* genotypes under control and  
297 stress conditions), SRP052520 (representing drought stress treatment of 14-day seedlings) and  
298 SRP061631 (three tissue of leaf, root and stem under control and drought condition). The repetitive  
299 sequence data were downloaded from the Plant Repeats Database ([http://plantrepeats.plantbiology.  
300 msu.edu/downloads.html](http://plantrepeats.plantbiology.msu.edu/downloads.html)). Find\_circ used to identify maize circRNAs was downloaded from  
301 [https://github.com/marvin-jens/find\\_circ](https://github.com/marvin-jens/find_circ).

302

### 303 **Computational identification and characteristics of circRNAs**

304 The algorithm find\_circ [2] was mainly used to predict circRNAs in our study. Generally, the main  
305 pipelines are as follows. Transcriptome data were transferred to the computational method  
306 (find\_circ) to identify circRNAs in the genome. Concisely, all reads were mapped to the reference  
307 genome by Bowtie2 (v2.1.0)[44]. Then, 20 nucleotide sequences from both ends of the unmapped  
308 reads were aligned independently to the reference genome to find unique anchor positions. The  
309 anchors located in genomes with a reversed orientation from the initial order in the reads were  
310 regarded as circRNA splicing events. The GU/AG splice sites should be satisfied when the splicing  
311 event occurs around a breakpoint. The following additional filters were used: not less than two  
312 junction reads to support the circRNA splicing and no more than a 100 kb splicing distance in the

313 genome. In-house perl scripts were used to analyze the characteristics of maize circRNAs.

314

### 315 **Conservation analysis of circRNAs**

316 To explore circRNA conservation, circRNA candidates predicted as exonic circRNAs were selected  
317 in *Z. mays*, *A. thaliana* and *O. sativa* [15]. To determine the orthologous gene pairs between species,  
318 *Z. mays* protein sequences were blasted against with *A. thaliana* and *O. sativa* protein  
319 sequences (BlastP in BLAST+, v2.2.26,  $E < 1e-10$ ), and the best paired genes were selected as  
320 orthologs by using our in-house Perl scripts. Then circRNAs from orthologous parental genes in  
321 both species were reanalyzed and regarded as conserved circRNAs by using BLAST (BLAST+,  
322 v2.2.26). Another two species, *S. lycopersicum* and *G. max* were analyzed with the same method.  
323 The alignment programme mVISTA was used to globally align DNA sequences to allow  
324 identification of sequence similarities and differences ( $P < 0.05$ ).

325

### 326 **Validation of maize circRNAs**

327 Maize (*Zea mays L.*) seedlings were first grown for 2-week-old in the greenhouse (30/22°C of  
328 day/night temperature, a 16-h light/8-h dark cycle). Total RNA was isolated from leaves of the  
329 maize seedlings using TRIzol reagent (Ambion) according to the manufacturer's instructions.  
330 Partial total RNA samples were treated for 15 min at 37°C with 3 units  $\mu\text{g}^{-1}$  of RNase R (Epicentre).  
331 RNase R could digest essentially linear RNAs. First-strand cDNA was synthesized from untreated  
332 and RNase R-treated total RNA using the iScript cDNA synthesis kit (Bio-Rad) respectively.  
333 Polymerase chain reaction (PCR) primers (divergent and convergent) were designed for circRNA  
334 validation (S4 Table). The reagent 2 × Taq Master Mix (Vazyme, Nanjing, CN) was used for cDNA  
335 and gDNA amplification. PCR amplification conditions were as follows: 5 min pre-denaturation at  
336 94°C; 34 cycles of 30 s denaturing at 94°C, 40 s annealing at the suitable temperature according to  
337 the primers, 30 s extension at 72°C; 10 min extension at 72°C. Then, Sanger sequencing was  
338 performed on all PCR products.

339

## 340 **Expression analysis of circRNAs and their parent genes**

341 The expression level of each circRNA was evaluated by ratio of circular-to-linear and junction read  
342 counts (RPM) [4, 33]. The expression levels of the corresponding mRNAs were determined by  
343 RPKM values (reads per kilobase of exon model per million mapped reads in the sample). The  
344 circRNAs were classified into five levels: 0-0.5, 0.5-1, 1-5, 5-10, and >10. The parent genes were  
345 classified as 0-50, 50-100, 100-500, 500-2000, and >2000. Pearson's correlation coefficient was  
346 used to evaluate the coexpression of circRNAs and their parent genes.

347 The degree of tissue specificity for circRNAs was evaluated with a tissue-specific index that

348 ranged from 0 to 1 [45]. The tissue-specific index =  $\frac{\sum_{i=1}^n (1 - \exp_i / \exp_{max})}{(n-1)}$ , in which  $n$  is the

349 number of tissues,  $\exp_i$  is the expression value of each circRNA in tissue  $i$ , and  $\exp_{max}$  is the  
350 maximum expression value of each circRNA or linear gene among 10 selected tissues. The  
351 circRNAs with an index greater than 0.9 were deemed as exhibit specific expression in one tissue.

352 The criteria for differential expression in circRNAs and their parent genes were determined by fold  
353 changes based on the software edgeR ( $P < 0.05$ ).

354

## 355 **Function predictions of circRNAs in maize**

### 356 **Functional analysis of circRNAs originated from protein-coding genes**

357 To explore whether circRNAs were generated from parent genes with special functions, the protein  
358 sequences of the parent genes corresponding to the circRNAs were firstly blasted against the nr  
359 database, then GO enrichment and KEGG analysis were performed for the parent genes generating  
360 circRNAs by using Blast2GO with Fisher's exact test ( $FDR < 0.05$ )[46].

361

### 362 **Functional analysis of circRNAs acting as miRNA decoys**

363 To test whether circRNAs could act as miRNA decoys, 203 sequences of plant miRNAs  
364 downloaded from miRBase (<http://mirbase.org/>) were aligned to the circRNA candidate sequences

365 using GSTAr.pl (<https://github.com/MikeAxtell/GSTAr>). The method used to predict miRNA  
366 decoys from circRNAs was built from previous reports [38, 39]. The general criteria were as  
367 follows: 1) one to six mismatched or inserted bases were allowed between the ninth to twentieth  
368 nucleotides from the miRNA 5' end; 2) the position from the second to the eighth nucleotide of the  
369 5' end of the miRNA sequence was requested to have perfect matching; 3) no more than 4  
370 mismatches or indels were allowed in other regions.

371 We also constructed and visualized the circRNA-miRNA-mRNA network by integrating  
372 miRNAs, circRNAs acting as miRNA decoys and mRNAs acting as miRNA targets [39]. The  
373 functions of the circRNAs acting as miRNA decoys were speculated based on the circRNA-  
374 miRNA-mRNA networks according to the ceRNA hypothesis and GO analysis. The IDs of all listed  
375 mRNAs connected with circRNAs acting as miRNA decoys were firstly submitted to Blast2GO,  
376 then conduct the GO enrichment analysis using Fisher's exact test ( $FDR < 0.05$ ).

377

### 378 **The driving force underlying backsplicing of circRNAs**

379 According to the annotation file, the different gradient intronic sequences flanking the backsplice  
380 sites (20 nt, 50 nt, 100 nt, 200 nt, and 500 nt) were extracted. To test the extent of reverse  
381 complementation of intronic sequences flanking circRNAs, those sequences used as input and  
382 database were blasted to itself (BlastN in BLAST+, v2.2.26,  $E < 1e-5$ , word size 5). The BLAST  
383 results were examined using our custom Perl scripts. In addition, repetitive sequences were aligned  
384 to 500 nt downstream and upstream of intronic sequences flanking the backsplice sites to determine  
385 whether the repetitive elements played a role in the circularization mechanism.

386

### 387 **Supporting information**

388 **S1 Fig. Workflow used to predict circRNAs.** Schematic diagram for the prediction of circRNAs  
389 in accordance with the method in a previous report.

390 **S2 Fig. Alternative circularization and conservation.** (A) Example of single and multiple



391 circularized exon and type of alternative circularization. Backspliced reads are marked. Orange  
392 rectangles: exons in transcripts; yellow rectangles: exons in another transcript derived from the  
393 same gene in the third example. Black line at the exon boundaries: backsplice site overlapped with  
394 known exon boundaries; red line: novel splice site. Absolute green arrows: backsplice using both  
395 annotated splice sites; green arrows with a blue rim: backsplice using two annotated splice sites  
396 from different transcripts; blue arrows: backsplice using no known exon boundaries. (B) Another  
397 example of sequence conservation analysis of circRNAs between *A. thaliana* and *Z. mays*. The label  
398 is the same as Fig 2C.

399 **S3 Fig. Expression profiling of circRNAs and their parent genes.** Related to Fig 3. (A)  
400 Expression level of circRNAs measured by the ratio of circular to linear in different scopes. (B)  
401 Expression level of parent genes overlapped with circRNAs in different ranges. (C) Heatmap of  
402 circRNAs with tissue-specific expression. (D) Differential expression of circRNAs and their parent  
403 genes under heat conditions in the seedlings.

404 **S4 Fig. Functional analysis of circRNAs.** (A) Enrichment analysis for genes overlapped with  
405 circRNAs that were significant (Fisher's test,  $P < 0.05$ ). The x- and y-axes are the same as Figure 5.  
406 (B) Genome-wide miRNA-regulated networks. Pink nodes: circRNAs; blue nodes: miRNAs; green  
407 nodes: mRNAs. Grey edges: correlations.

408 **S5 Fig. Feature of intron flanking circularized exons.** (A) Mean length distribution of upstream  
409 and downstream intron flanking circularized exons in *tomato*. (B) Example for intron pairing of  
410 reverse complementation in flanking sequences of the backsplice sites. Repetitive elements exist in  
411 the downstream of these complementary sequences (red colour). A part of the pair of the second  
412 circRNA is shown.

413 **S1 Table. Prediction of circRNAs from various transcriptome data sets in *Z. mays*.**

414 **S2 Table. Alternative circularization phenomenon and whether the backsplice site is  
415 annotated.**

416 **S3 Table. Result of Conservation analysis.** (A) Result of Conservation analysis between maize



417 and rice. (B) Result of Conservation analysis between maize and *Arabidopsis Thaliana*. (C) Result  
418 of Conservation analysis between maize and Soybean. (D) Result of Conservation analysis between  
419 maize and tomato.

420 **S4 Table. Primers used to validate maize circRNAs.** (A) Divergent primers for validation of  
421 candidate circRNAs. (B) Convergent primers for validation of candidate circRNAs.

422 S5 Table. Correlation of circRNAs and their corresponding parent genes.

423 **S6 Table. Functional prediction of circRNAs originated from protein-coding genes indirectly.**

424 (A) CircRNAs and their parent genes function. (B) Pathway statistics

425 **S7 Table. List of circRNAs acting as miRNA decoys.** miRNA were listed in the first column.

426 CircRNA in the second column acting as the miRNA decoys. The following columns mean the  
427 starting and terminating sites between circRNA and miRNA, MFE of a perfectly matched site, MFE  
428 of the alignments, MFE<sub>site</sub>/MFE<sub>perfect</sub>, respectively. MFE: minimum free energy.

429 **S8 Table. Gene ontology (GO) analysis of circRNAs acting as miRNA decoys based on ceRNA  
430 hypothesis.**

431 **S9 Table. Reverse complement in different intervals of intron flanking circularized exons.** The  
432 length was extracted in 50 nt, 100 nt, 200 nt and 500 nt intronic regions.

433

## 434 **Abbreviations**

435 circRNAs: Circular RNAs; RPM: Reads per million mapped reads; ss: Splicing site; miRNAs:  
436 microRNAs; RBP: RNA binding proteins; ecircRNA: Exonic circRNAs; CDS: Coding sequence;  
437 UTR: Untranslated regions; AS: Alternative splicing; RPKM: Reads per kilobase of exon model per  
438 million mapped reads; IRES: Internal ribosome entry site; ORF: Open reading frame; ceRNA:  
439 Competing endogenous RNAs; GO: Gene ontology; lincRNAs: Long intergenic noncoding RNAs;  
440 nt: Nucleotide; dr: Drought; ctrl: Control.

441

## 442 **Acknowledgements**

443 This work was supported by grants from the National Natural Science Foundation of China (Grant  
444 No.31070256, No.31370329 and No.11631012), the Program for New Century Excellent Talents in  
445 University (NCET-12-0896), the Natural Science Basic Research Plan of Shaanxi Province, China  
446 (No. 2014JM3074), and the Fundamental Research Funds for the Central Universities (No.  
447 GK201403004). The funding agencies had no role in the study, its design, the data collection and  
448 analysis, the decision to publish, or the preparation of the manuscript.

449

## 450 **Author Contributions**

451 **Conceptualization:** Baihua Tang, Guanglin Li.

452 **Data curation:** Baihua Tang, Zhiqiang Hao.

453 **Formal analysis:** Baihua Tang, Zhiqiang Hao, Yanfeng Zhu, Hua Zhang.

454 **Writing - original draft:** Baihua Tang, Zhiqiang Hao, Yanfeng Zhu, Guanglin Li.

455 **Writing - review & editing:** Baihua Tang, Zhiqiang Hao, Yanfeng Zhu.

456

## 457 **References**

- 458 1. Salzman J, Gawad C, Wang PL, Lacayo N, Brown PO. Circular RNAs are the predominant  
459 transcript isoform from hundreds of human genes in diverse cell types. *PloS one*. 2012; 7(2):  
460 e30733.
- 461 2. Memczak S, Jens M, Elefsinioti A, Torti F, Krueger J, Rybak A, et al. Circular RNAs are a  
462 large class of animal RNAs with regulatory potency. *Nature*. 2013; 495(7441): 333-338.
- 463 3. Jeck WR, Sorrentino JA, Wang K, Slevin MK, Burd CE, Liu J, et al. Circular RNAs are  
464 abundant, conserved, and associated with ALU repeats. *RNA (New York, NY)*. 2013; 19(2):  
465 141-157.
- 466 4. Gao Y, Wang J, Zhao F. CIRI: an efficient and unbiased algorithm for de novo circular RNA  
467 identification. *Genome biology*. 2015; 16: 4.
- 468 5. Guo JU, Agarwal V, Guo H, Bartel DP. Expanded identification and characterization of

- 469 mammalian circular RNAs. *Genome biology*. 2014; 15(7): 409.
- 470 6. Houseley JM, Garcia-Casado Z, Pascual M, Paricio N, O'Dell KM, Monckton DG, et al.  
471 Noncanonical RNAs from transcripts of the *Drosophila* muscleblind gene. *The Journal of*  
472 *heredity*. 2006; 97(3): 253-260.
- 473 7. Li XF, Lytton J. A circularized sodium-calcium exchanger exon 2 transcript. *The Journal of*  
474 *biological chemistry*. 1999; 274(12): 8153-8160.
- 475 8. Zaphiropoulos PG. Circular RNAs from transcripts of the rat cytochrome P450 2C24 gene:  
476 correlation with exon skipping. *Proceedings of the National Academy of Sciences of the*  
477 *United States of America*. 1996; 93(13): 6536-6541.
- 478 9. Bailleul B. During in vivo maturation of eukaryotic nuclear mRNA, splicing yields excised  
479 exon circles. *Nucleic acids research*. 1996; 24(6): 1015-1019.
- 480 10. Zaphiropoulos PG. Exon skipping and circular RNA formation in transcripts of the human  
481 cytochrome P-450 2C18 gene in epidermis and of the rat androgen binding protein gene in  
482 testis. *Molecular and cellular biology*. 1997; 17(6): 2985-2993.
- 483 11. Wang PL, Bao Y, Yee MC, Barrett SP, Hogan GJ, Olsen MN, et al. Circular RNA is expressed  
484 across the eukaryotic tree of life. *PloS one*. 2014; 9(6): e90859.
- 485 12. Burd CE, Jeck WR, Liu Y, Sanoff HK, Wang Z, Sharpless NE. Expression of linear and novel  
486 circular forms of an INK4/ARF-associated non-coding RNA correlates with atherosclerosis  
487 risk. *PLoS genetics*. 2010; 6(12): e1001233.
- 488 13. Salzman J, Chen RE, Olsen MN, Wang PL, Brown PO. Cell-type specific features of circular  
489 RNA expression. *PLoS genetics*. 2013; 9(9): e1003777.
- 490 14. Conn SJ, Pillman KA, Toubia J, Conn VM, Salmanidis M, Phillips CA, et al. The RNA  
491 binding protein quaking regulates formation of circRNAs. *Cell*. 2015; 160(6): 1125-1134.
- 492 15. Ye CY, Chen L, Liu C, Zhu QH, Fan L. Widespread noncoding circular RNAs in plants. *The*  
493 *New phytologist*. 2015; 208(1): 88-95.
- 494 16. Li F, Zhang L, Li W, Deng J, Zheng J, An M, et al. Circular RNA ITCH has inhibitory effect

- 495 on ESCC by suppressing the Wnt/beta-catenin pathway. *Oncotarget*. 2015; 6(8): 6001-6013.
- 496 17. Bachmayr-Heyda A, Reiner AT, Auer K, Sukhbaatar N, Aust S, Bachleitner-Hofmann T, et al.  
497 Correlation of circular RNA abundance with proliferation--exemplified with colorectal and  
498 ovarian cancer, idiopathic lung fibrosis, and normal human tissues. *Scientific reports*. 2015; 5:  
499 8057.
- 500 18. Xuan L, Qu L, Zhou H, Wang P, Yu H, Wu T, et al. Circular RNA: a novel biomarker for  
501 progressive laryngeal cancer. *American journal of translational research*. 2016; 8(2): 932-939.
- 502 19. Li P, Chen S, Chen H, Mo X, Li T, Shao Y, et al. Using circular RNA as a novel type of  
503 biomarker in the screening of gastric cancer. *Clinica chimica acta; international journal of*  
504 *clinical chemistry*. 2015; 444: 132-136.
- 505 20. Hansen TB, Wiklund ED, Bramsen JB, Villadsen SB, Statham AL, Clark SJ, et al. miRNA-  
506 dependent gene silencing involving Ago2-mediated cleavage of a circular antisense RNA. *The*  
507 *EMBO journal*. 2011; 30(21): 4414-4422.
- 508 21. Jeck WR, Sharpless NE. Detecting and characterizing circular RNAs. *Nature biotechnology*.  
509 2014; 32(5): 453-461.
- 510 22. Hansen TB, Jensen TI, Clausen BH, Bramsen JB, Finsen B, Damgaard CK, et al. Natural RNA  
511 circles function as efficient microRNA sponges. *Nature*. 2013; 495(7441): 384-388.
- 512 23. Capel B, Swain A, Nicolis S, Hacker A, Walter M, Koopman P, et al. Circular transcripts of  
513 the testis-determining gene *Sry* in adult mouse testis. *Cell*. 1993; 73(5): 1019-1030.
- 514 24. Sun X, Wang L, Ding J, Wang Y, Wang J, Zhang X, et al. Integrative analysis of *Arabidopsis*  
515 *thaliana* transcriptomics reveals intuitive splicing mechanism for circular RNA. *FEBS letters*.  
516 2016; 590(20): 3510-3516.
- 517 25. Lu T, Cui L, Zhou Y, Zhu C, Fan D, Gong H, et al. Transcriptome-wide investigation of  
518 circular RNAs in rice. *RNA (New York, NY)*. 2015; 21(12): 2076-2087.
- 519 26. Ye CY, Zhang X, Chu Q, Liu C, Yu Y, Jiang W, et al. Full-length sequence assembly reveals  
520 circular RNAs with diverse non-GT/AG splicing signals in rice. *RNA biology*. 2017; 14(8):

- 521 1055-1063.
- 522 27. Zuo J, Wang Q, Zhu B, Luo Y, Gao L. Deciphering the roles of circRNAs on chilling injury in  
523 tomato. *Biochemical and biophysical research communications*. 2016.
- 524 28. Darbani B, Noeparvar S, Borg S. Identification of Circular RNAs from the Parental Genes  
525 Involved in Multiple Aspects of Cellular Metabolism in Barley. *Frontiers in plant science*.  
526 2016; 7: 776.
- 527 29. Chen L, Zhang P, Fan Y, Lu Q, Li Q, Yan J, et al. Circular RNAs mediated by transposons are  
528 associated with transcriptomic and phenotypic variation in maize. *The New phytologist*. 2018;  
529 217(3): 1292-1306.
- 530 30. Zeng RF, Zhou JJ, Hu CG, Zhang JZ. Transcriptome-wide identification and functional  
531 prediction of novel and flowering-related circular RNAs from trifoliolate orange (*Poncirus*  
532 *trifoliata* L. Raf.). *Planta*. 2018; 247(5): 1191-1202.
- 533 31. Liang D, Wilusz JE. Short intronic repeat sequences facilitate circular RNA production. *Genes*  
534 *& development*. 2014; 28(20): 2233-2247.
- 535 32. Wang Y, Wang Z. Efficient backsplicing produces translatable circular mRNAs. *RNA (New*  
536 *York, NY)*. 2015; 21(2): 172-179.
- 537 33. Zhang XO, Wang HB, Zhang Y, Lu X, Chen LL, Yang L. Complementary sequence-mediated  
538 exon circularization. *Cell*. 2014; 159(1): 134-147.
- 539 34. Westholm JO, Miura P, Olson S, Shenker S, Joseph B, Sanfilippo P, et al. Genome-wide  
540 analysis of drosophila circular RNAs reveals their structural and sequence properties and age-  
541 dependent neural accumulation. *Cell reports*. 2014; 9(5): 1966-1980.
- 542 35. Thatcher SR, Zhou W, Leonard A, Wang BB, Beatty M, Zastrow-Hayes G, et al. Genome-  
543 wide analysis of alternative splicing in *Zea mays*: landscape and genetic regulation. *The Plant*  
544 *cell*. 2014; 26(9): 3472-3487.
- 545 36. Ashwal-Fluss R, Meyer M, Pamudurti NR, Ivanov A, Bartok O, Hanan M, et al. circRNA  
546 biogenesis competes with pre-mRNA splicing. *Molecular cell*. 2014; 56(1): 55-66.

- 547 37. Li Z, Huang C, Bao C, Chen L, Lin M, Wang X, et al. Exon-intron circular RNAs regulate  
548 transcription in the nucleus. *Nature structural & molecular biology*. 2015; 22(3): 256-264.
- 549 38. Wu HJ, Wang ZM, Wang M, Wang XJ. Widespread long noncoding RNAs as endogenous  
550 target mimics for microRNAs in plants. *Plant physiology*. 2013; 161(4): 1875-1884.
- 551 39. Fan C, Hao Z, Yan J, Li G. Genome-wide identification and functional analysis of lincRNAs  
552 acting as miRNA targets or decoys in maize. *BMC genomics*. 2015; 16: 793.
- 553 40. Salmena L, Poliseno L, Tay Y, Kats L, Pandolfi PP. A ceRNA hypothesis: the Rosetta Stone  
554 of a hidden RNA language? *Cell*. 2011; 146(3): 353-358.
- 555 41. Ivanov A, Memczak S, Wyler E, Torti F, Porath HT, Orejuela MR, et al. Analysis of intron  
556 sequences reveals hallmarks of circular RNA biogenesis in animals. *Cell reports*. 2015; 10(2):  
557 170-177.
- 558 42. Dubin RA, Kazmi MA, Ostrer H. Inverted repeats are necessary for circularization of the  
559 mouse testis Sry transcript. *Gene*. 1995; 167(1-2): 245-248.
- 560 43. Pasmán Z, Been MD, Garcia-Blanco MA. Exon circularization in mammalian nuclear extracts.  
561 *RNA (New York, NY)*. 1996; 2(6): 603-610.
- 562 44. Langmead B, Salzberg SL. Fast gapped-read alignment with Bowtie 2. *Nature methods*. 2012;  
563 9(4): 357-359.
- 564 45. Yanai I, Benjamin H, Shmoish M, Chalifa-Caspi V, Shklar M, Ophir R, et al. Genome-wide  
565 midrange transcription profiles reveal expression level relationships in human tissue  
566 specification. *Bioinformatics (Oxford, England)*. 2005; 21(5): 650-659.
- 567 46. Conesa A, Gotz S, Garcia-Gomez JM, Terol J, Talon M, Robles M. Blast2GO: a universal tool  
568 for annotation, visualization and analysis in functional genomics research. *Bioinformatics*  
569 (Oxford, England). 2005; 21(18): 3674-3676.

570

571

572

573

574 **Table 1. The number of predicted circRNAs from five resources.**

| Resource     | The number of predicted circRNAs | Corresponding tissues                                      |
|--------------|----------------------------------|------------------------------------------------------------|
| Resource 1   | 588                              | seedling_ctrl <sup>a</sup> ; seedling_dr <sup>b</sup>      |
| Resource 2   | 1018                             | seedling; pollen; ovule; embryo sac                        |
| Resource 3   | 1768                             | cold; ctrl; heat; salt; UV                                 |
| Resource 4   | 2276                             | leaf_ctrl; leaf_dr; root_ctrl; root_dr; stem_ctrl; stem_dr |
| Resource 5   | 1361                             | ear; root; shoot; tassel                                   |
| Total        | 7011                             |                                                            |
| Total Unique | 3715                             |                                                            |

575 <sup>a</sup>ctrl: control; <sup>b</sup>dr: drought

576

577 **Table 2. Differential expression of circRNAs between control and treatment.**

| Control       | Treatment   | Number of circRNAs | Up <sup>a</sup> | Down <sup>b</sup> |
|---------------|-------------|--------------------|-----------------|-------------------|
| seedling_ctrl | seedling_dr | 58                 | 34              | 24                |
| ctrl          | cold        | 42                 | 25              | 17                |
| ctrl          | heat        | 48                 | 25              | 23                |
| leaf_ctrl     | leaf_dr     | 46                 | 20              | 26                |
| root_ctrl     | root_dr     | 43                 | 24              | 19                |
| stem_ctrl     | stem_dr     | 41                 | 18              | 23                |

578 <sup>a</sup>Number of circRNAs which up-regulated between control and treatment.

579 <sup>b</sup>Number of circRNAs which down-regulated between control and treatment.

580

581

582 **Fig 1. General feature of the circRNA candidates.** (A) Genomic locations of the circRNAs. The  
 583 backsplice site was predominantly located at CDS-only and intergenic-only. (B) Exon number  
 584 distributions of circRNAs and their parent genes. (C) Length distributions of circRNAs and their  
 585 parent genes. (D) Length distributions of back-spliced exons corresponding to different numbers of

586 exons.

587 **Fig 2. The genomic character and conservation of circRNAs.** (A) Mean length distribution of  
588 upstream and downstream intron flanking circularized exons in *Z.mays*. Longer intron bracketing  
589 circularized exons was observed than the parent gene. (B) The number of genes (y-axis) that  
590 generated different numbers of circRNAs (x-axis). (C) An example of sequence conservation  
591 analysis of circRNAs between *O. sativa* and *Z. mays*. Y-axis, levels of conservation based on  
592 genomic sequence similarity. The locations of circRNAs in their respective parent genes are marked  
593 with a red box. Conserved regions are labelled in different colours by VISTA according to the  
594 annotations (exons in blue shadow, UTR in cyan shadow and CNS (non-coding sequences) in red  
595 shadow).

596 **Fig 3. Validation of maize circRNAs.** Validation of circular RNAs (circRNAs) by PCR  
597 amplifications with divergent primers in maize. (A) Divergent and convergent primers for  
598 amplification of circRNA and linear RNA are shown in a model, respectively. (B) A set of  
599 divergent primers (black back-to-back triangle pairs) successfully amplified eight circRNAs in  
600 cDNA. A set of convergent primers (black opposing triangle pairs) could work on both cDNA and  
601 genomic DNA. Note: 1: seedling\_test\_circ\_000962, 2: seedling\_test\_circ\_001425, 3: seedling\_test\_  
602 circ\_000119, 4: seedlingd\_test\_circ\_002114, 5: Actin, 6: seedlingc\_test\_circ\_000623, 7: seedlingd\_  
603 test\_circ\_000813, 8: seedling\_test\_circ\_001637, 9: control\_test\_circ\_004099.

604 **Fig 4. Expression pattern of circRNAs.** (A) Expression level of circRNAs in different scopes.  
605 CircRNAs were usually expressed at lower levels, which may explain their difficult detection  
606 because they lack a poly(A) tail. ctrl and dr indicate control and drought, respectively. (B) The  
607 degree of circRNA expression under five different treatments was shown by heatmap. More  
608 circRNAs were present under heat stress. (C) Pie chart with rainbow colours showing the ratio of  
609 circRNAs possessing tissue-specific expression in 10 different tissues. (D) Tendency for differential  
610 expression of circRNAs and the overlapping genes was plotted using fold changes between the  
611 drought and control in root as the standard. The number of both differentially expression circRNAs



612 and genes is marked.

613 **Fig 5. circRNAs acting as miRNA decoys.** (A) Binding sites between a circRNA and the  
614 corresponding miRNA. (B) The circRNA-miRNA regulatory network. The single network was  
615 marked by orange circle. Representative single network were extracted from the integral network.  
616 Pink nodes represent circRNAs and blue nodes represent miRNAs. The edges represent connected  
617 nodes that exist as a correlation.

618 **Fig 6. Enrichment analysis for the function of circRNAs as miRNA decoys.** The GO terms  
619 containing BP (biological processes), MF (molecular functions) and CC (cell components). The GO  
620 annotation is presented on the x-axis legend and the percentage of genes on the y-axis legend  
621 (Fisher's test,  $P < 0.05$ ).

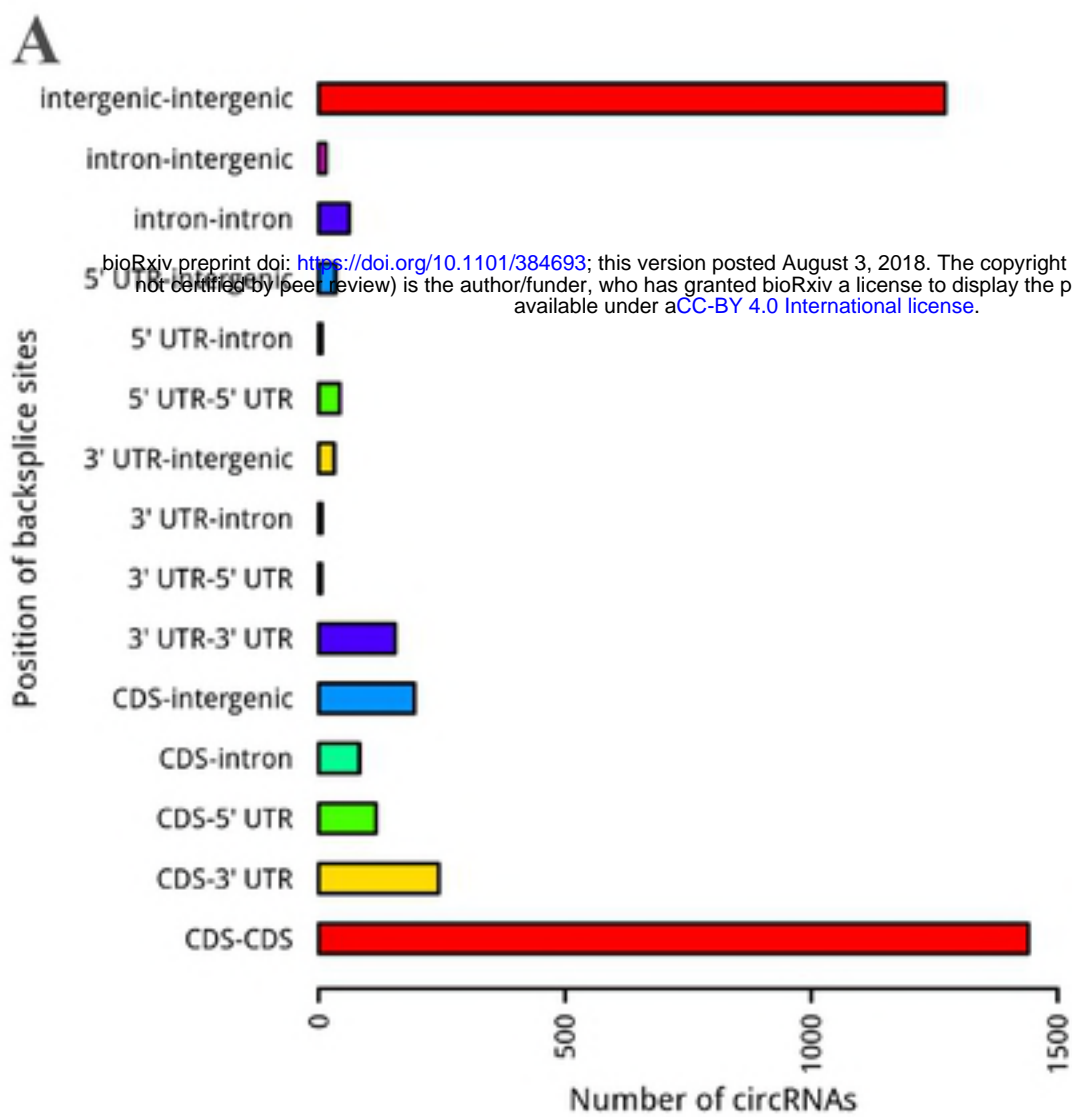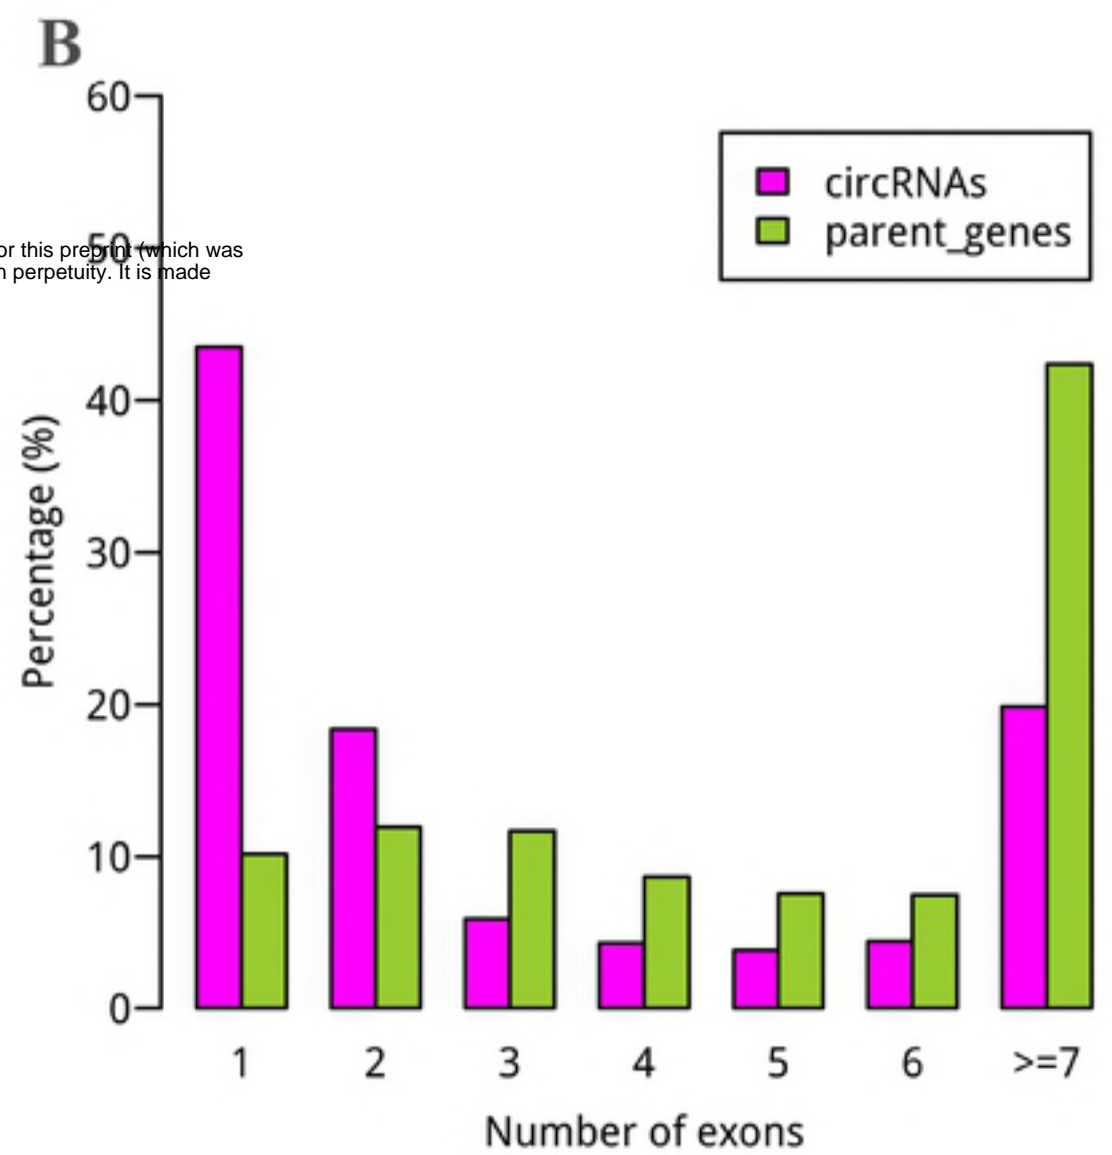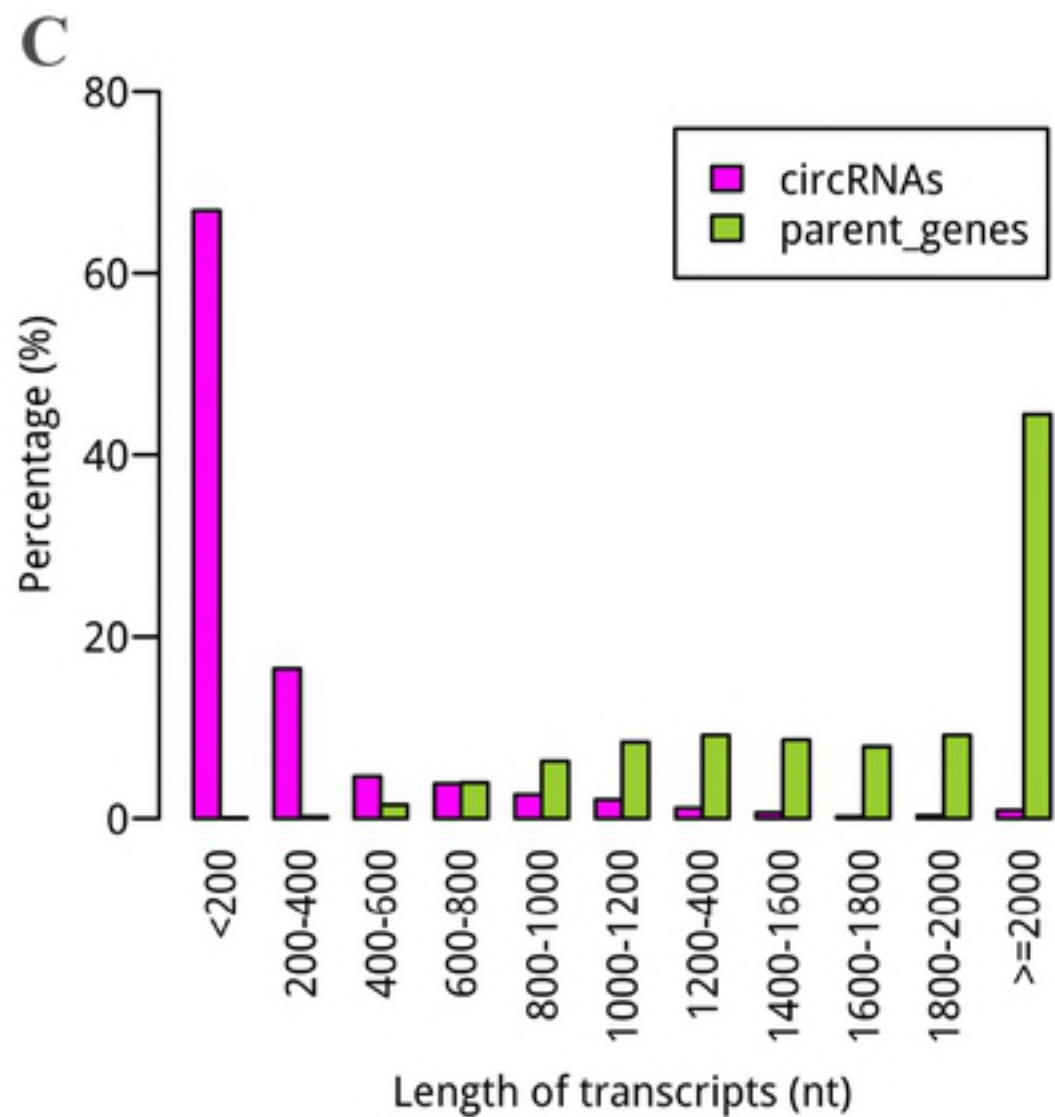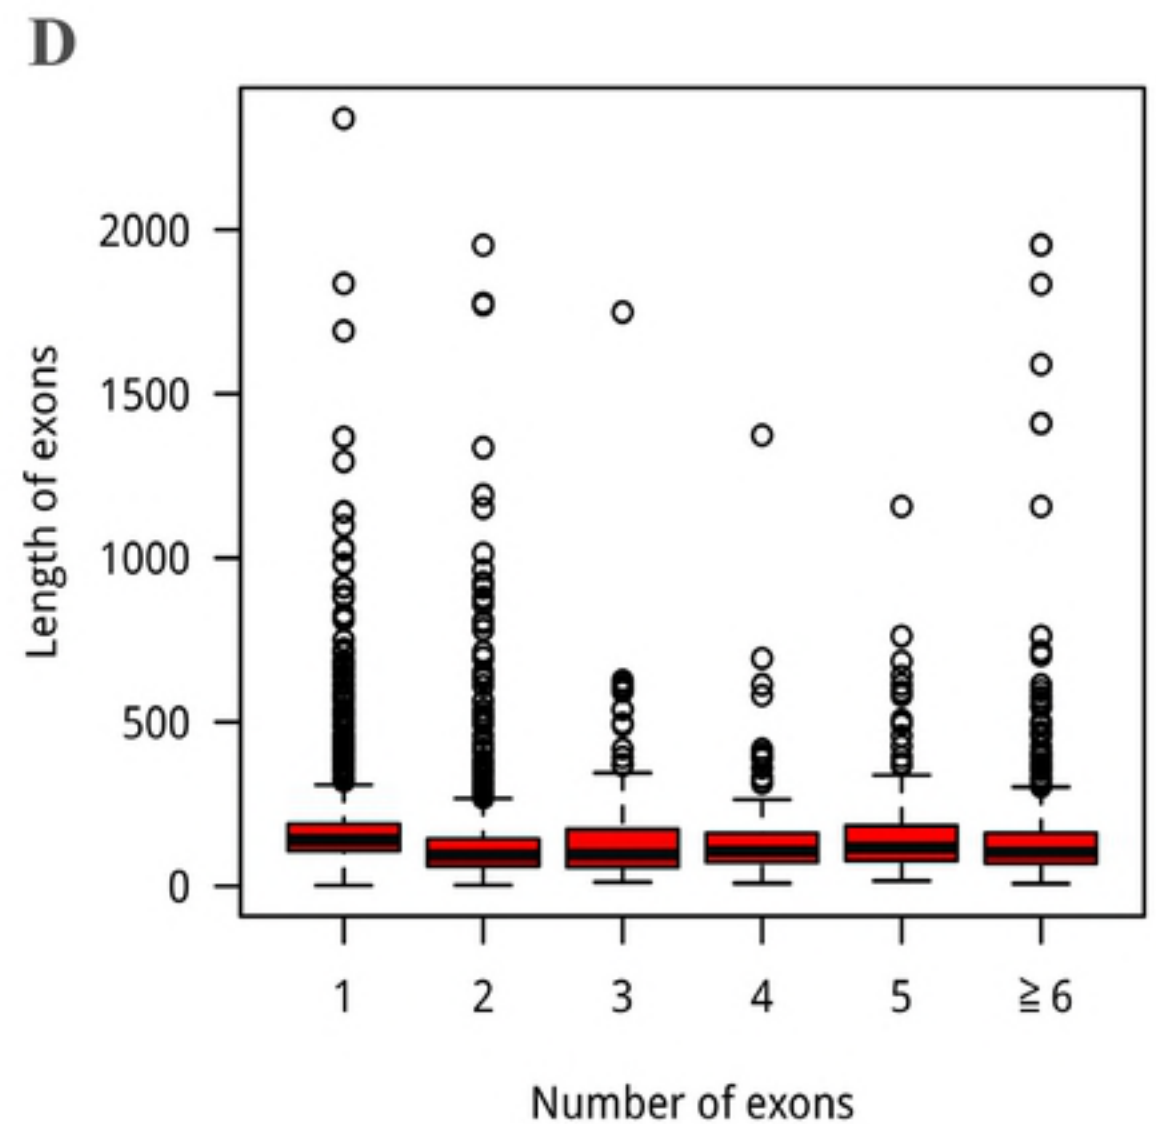

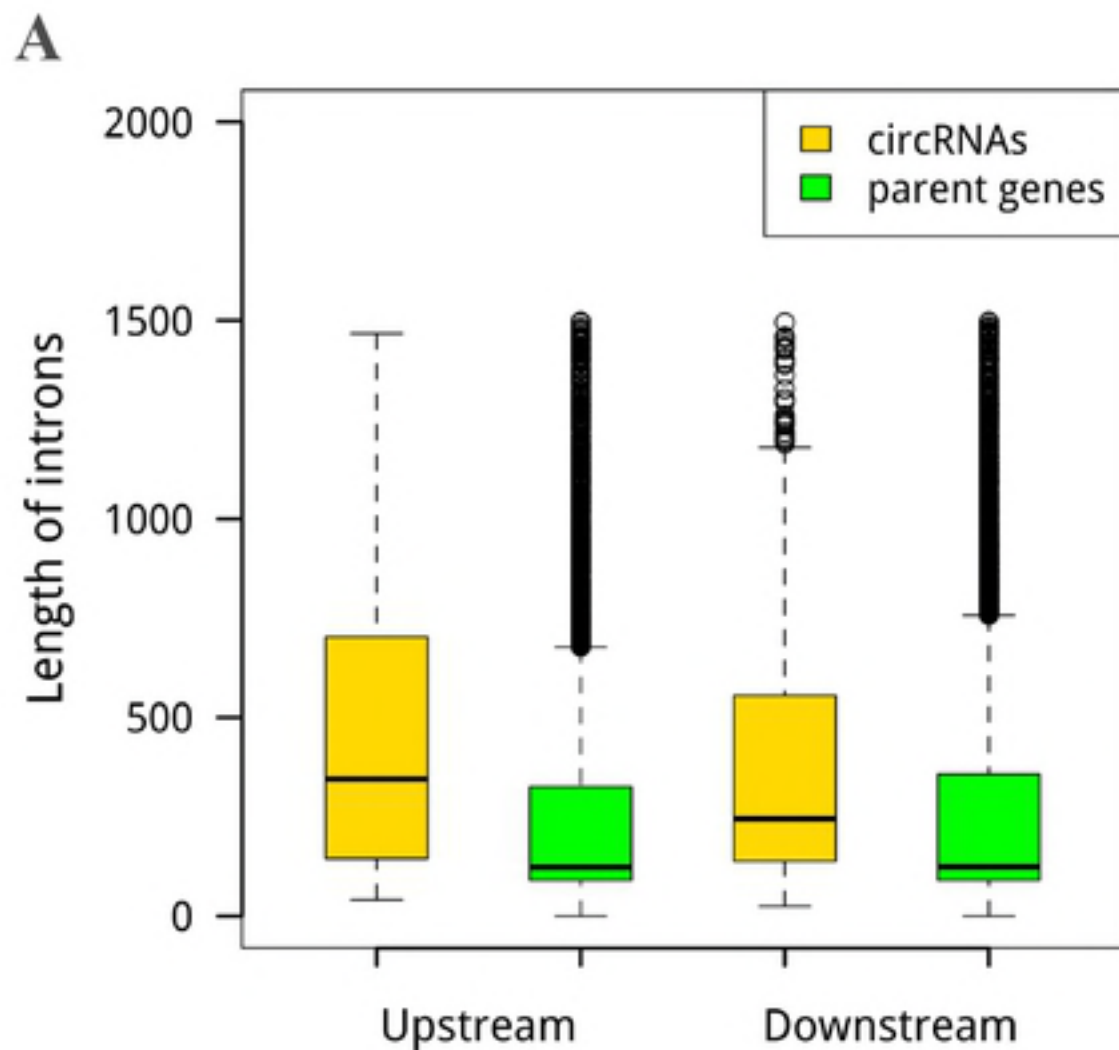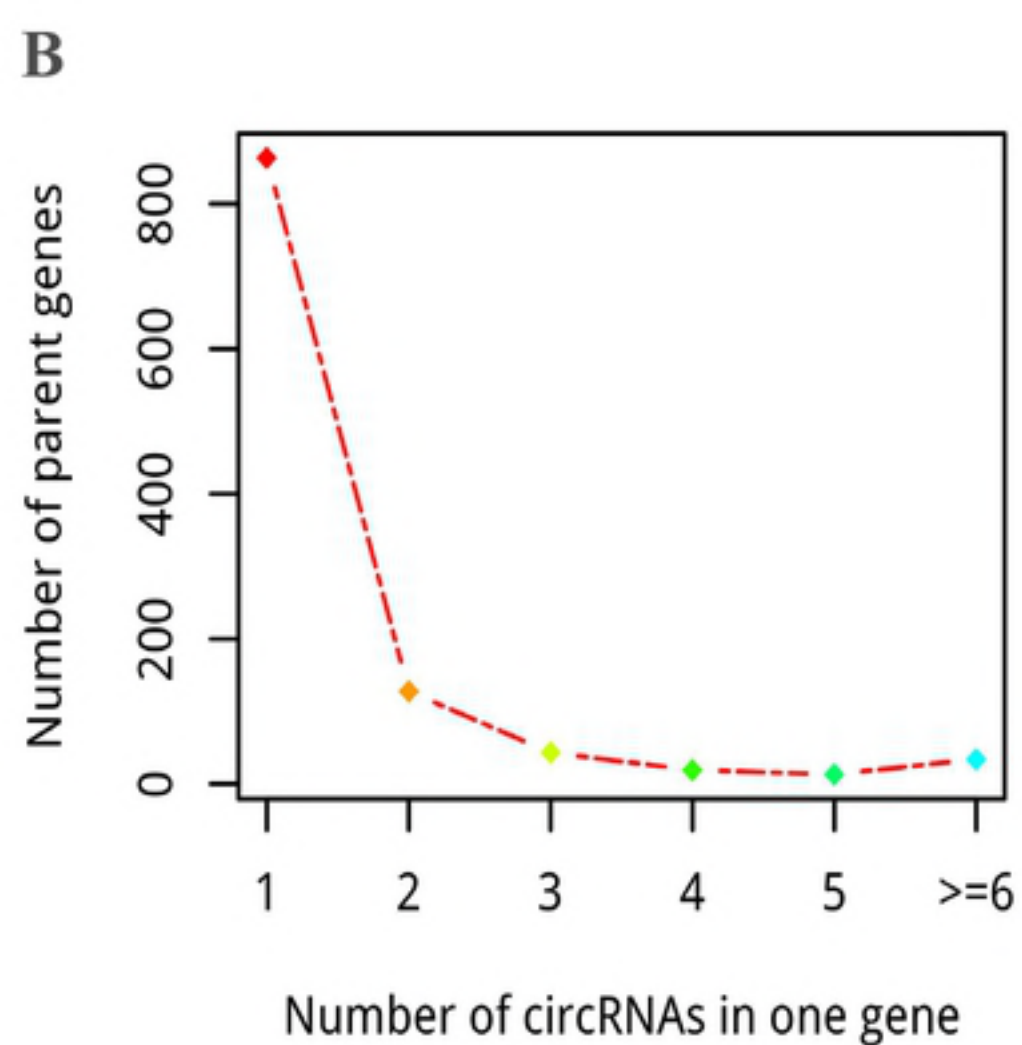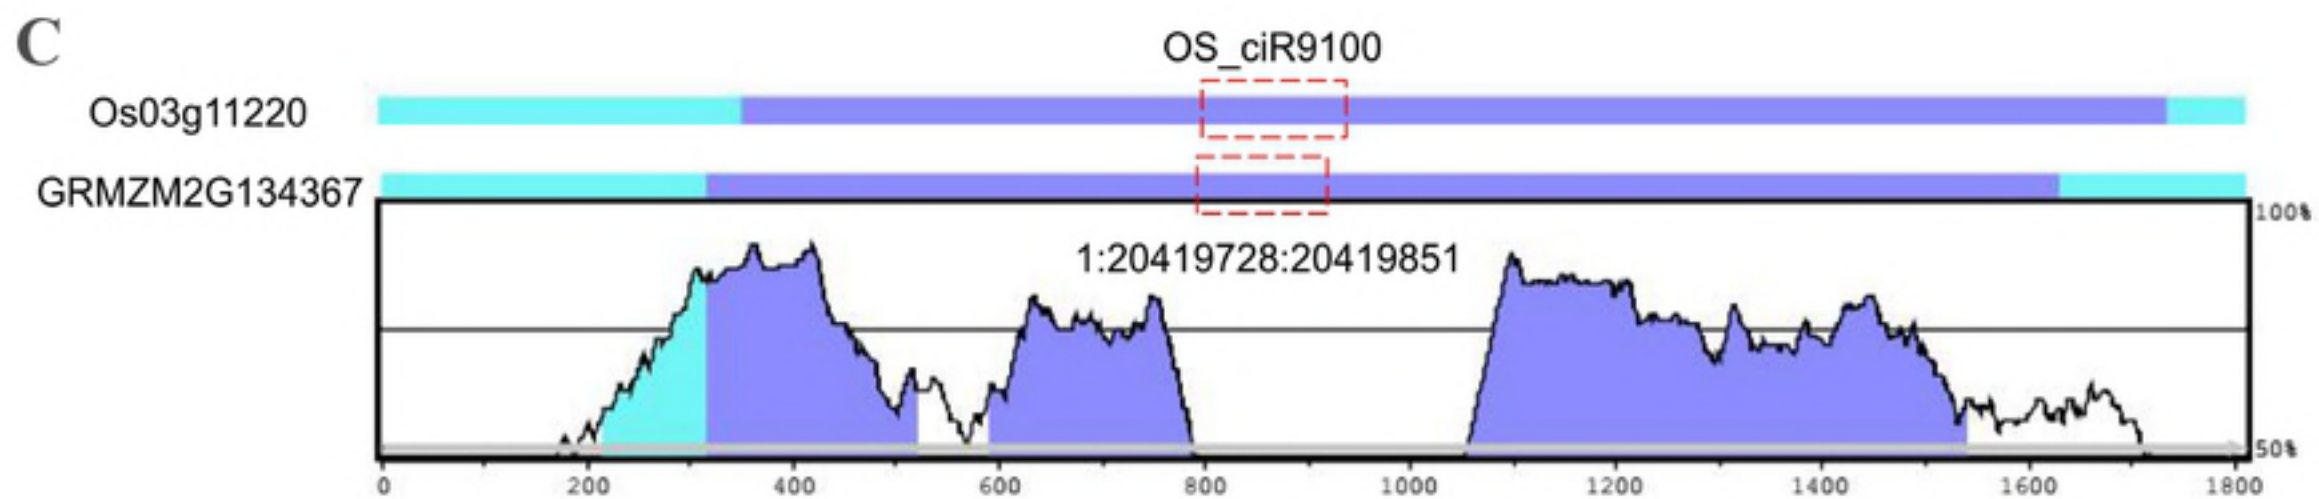

A

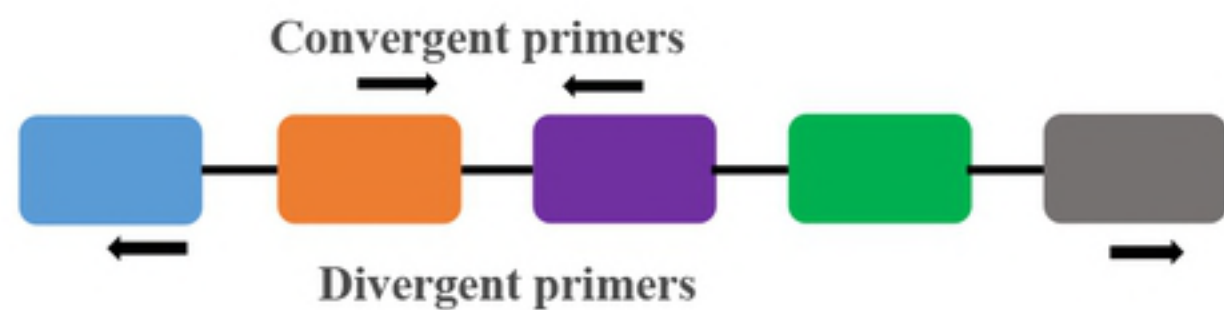

B

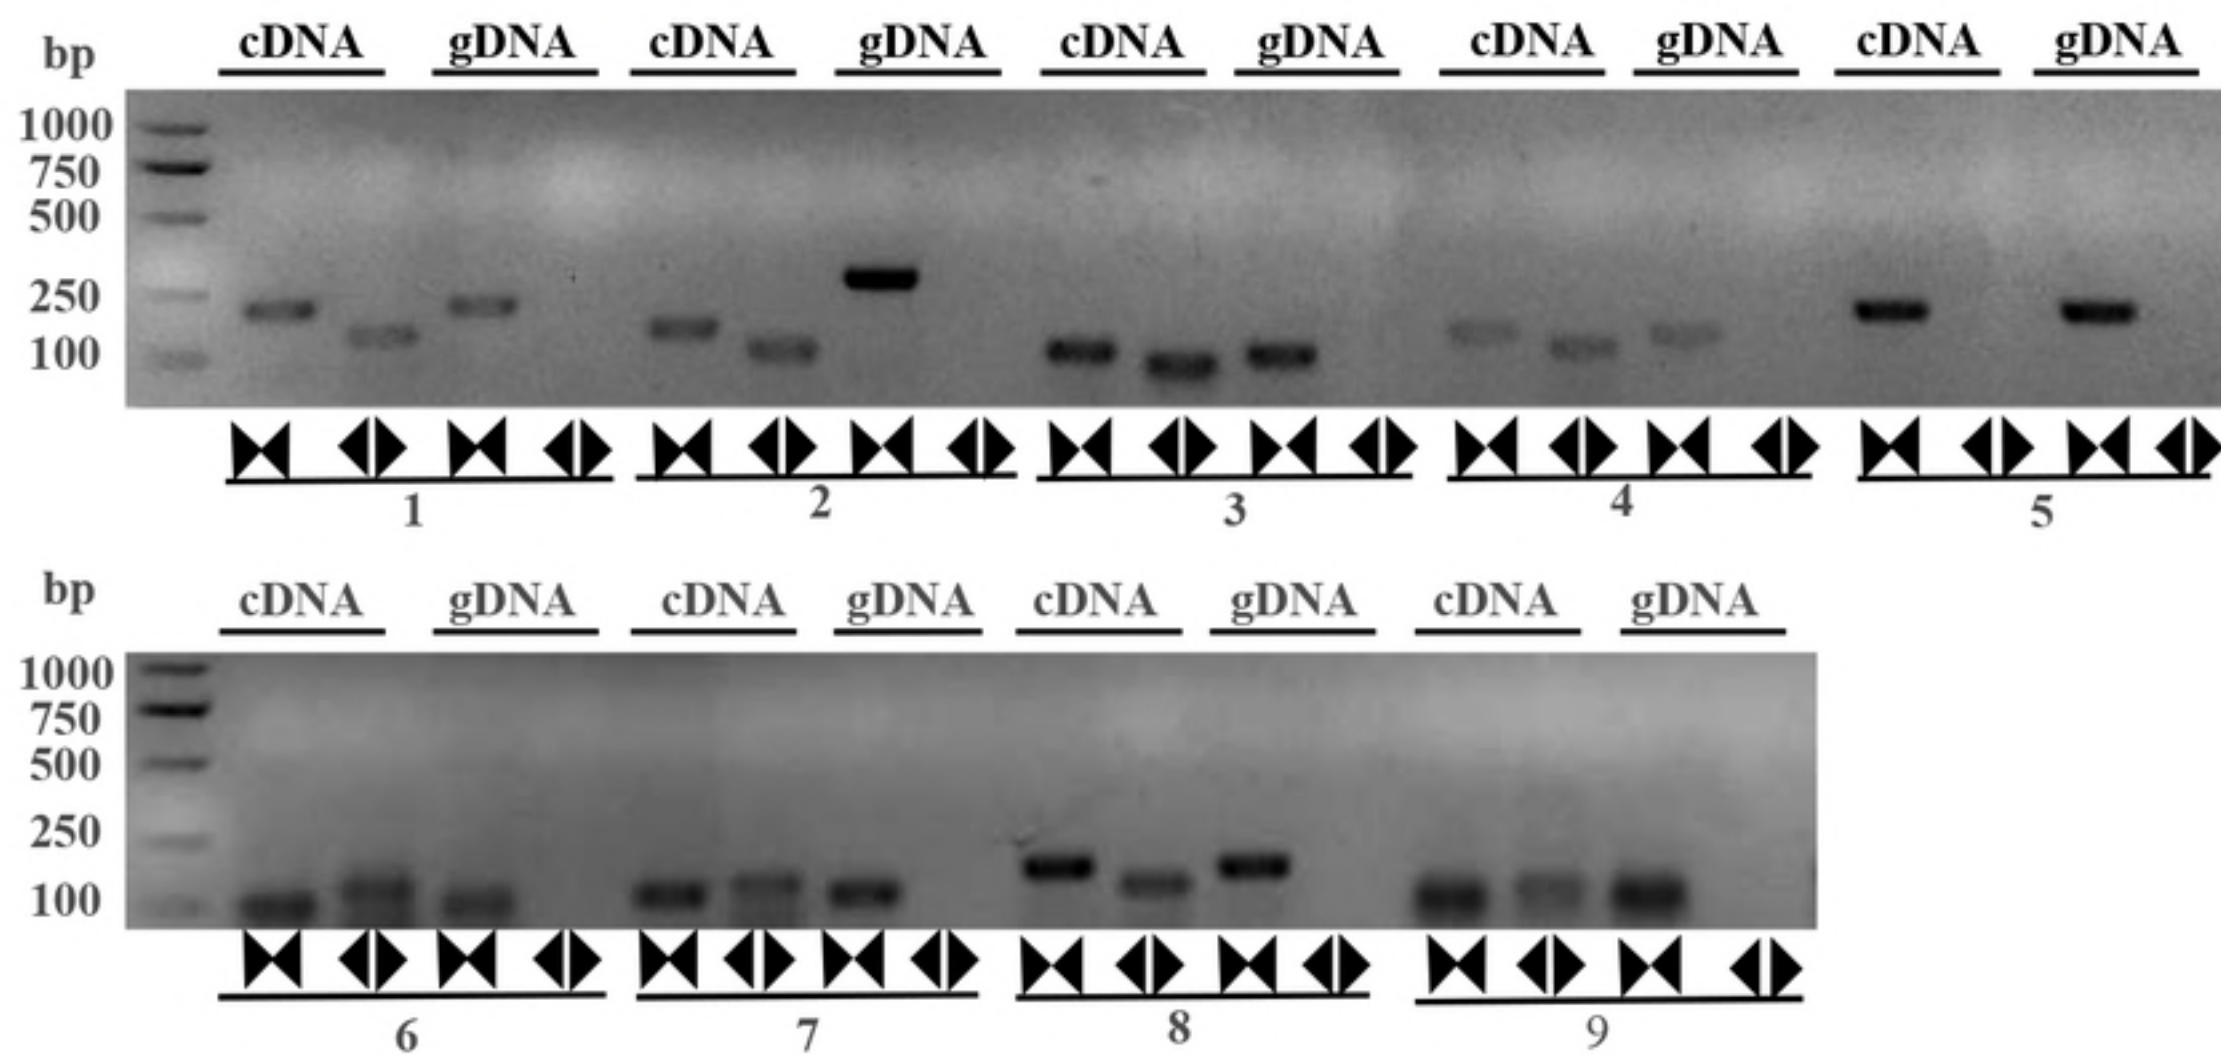

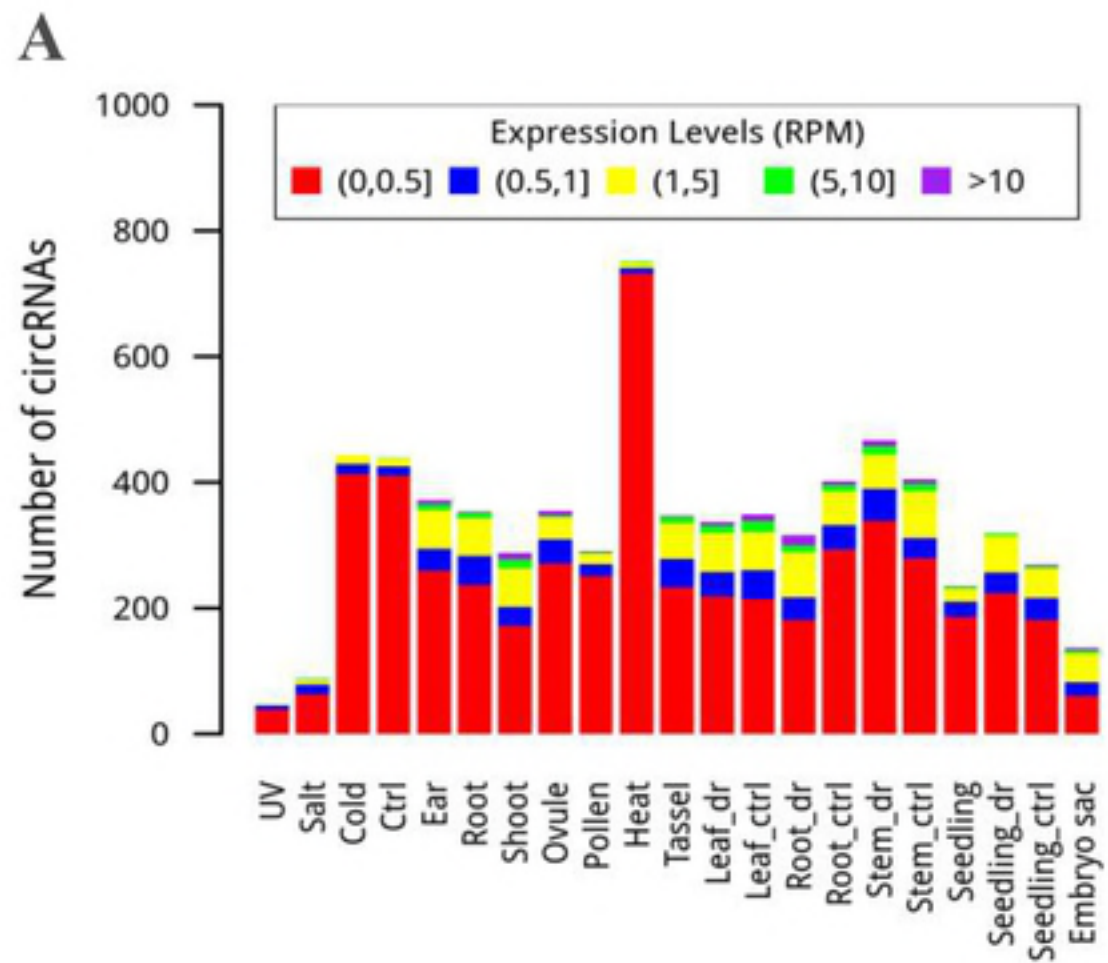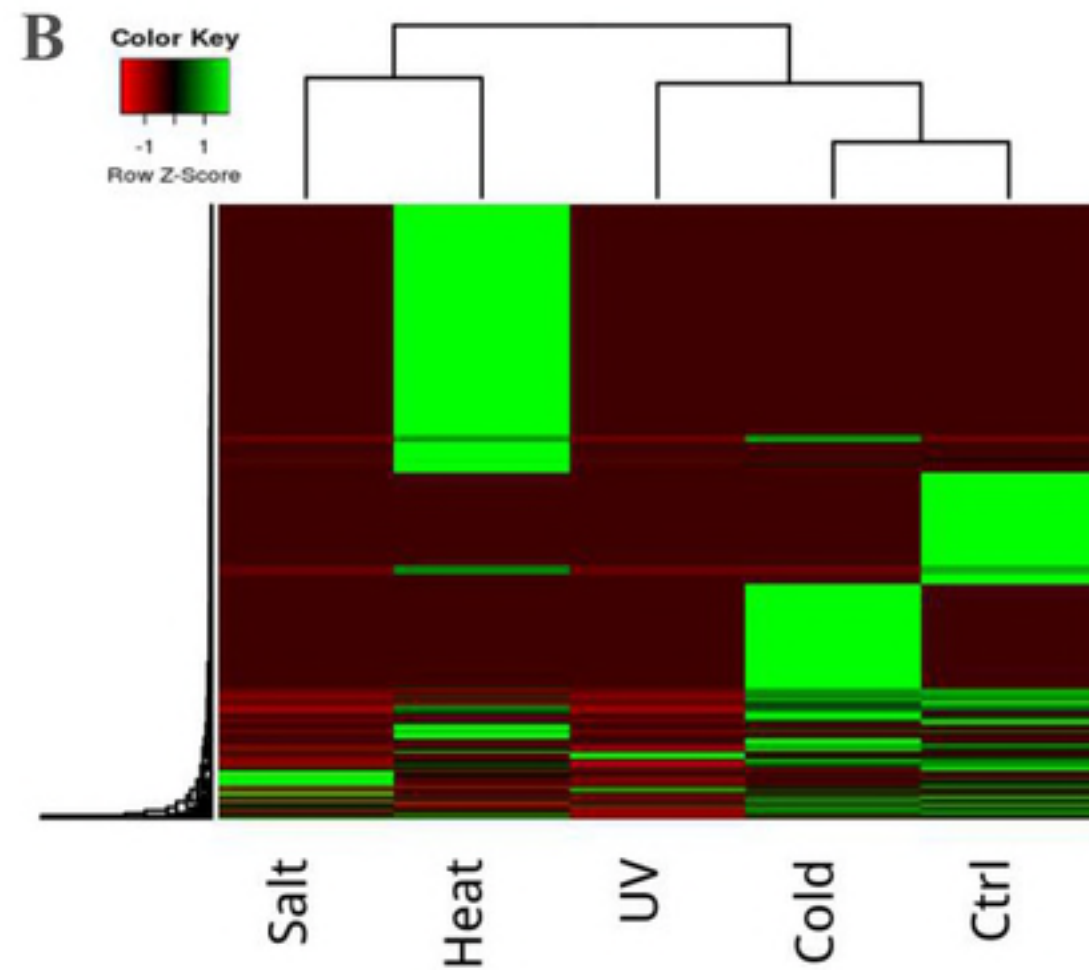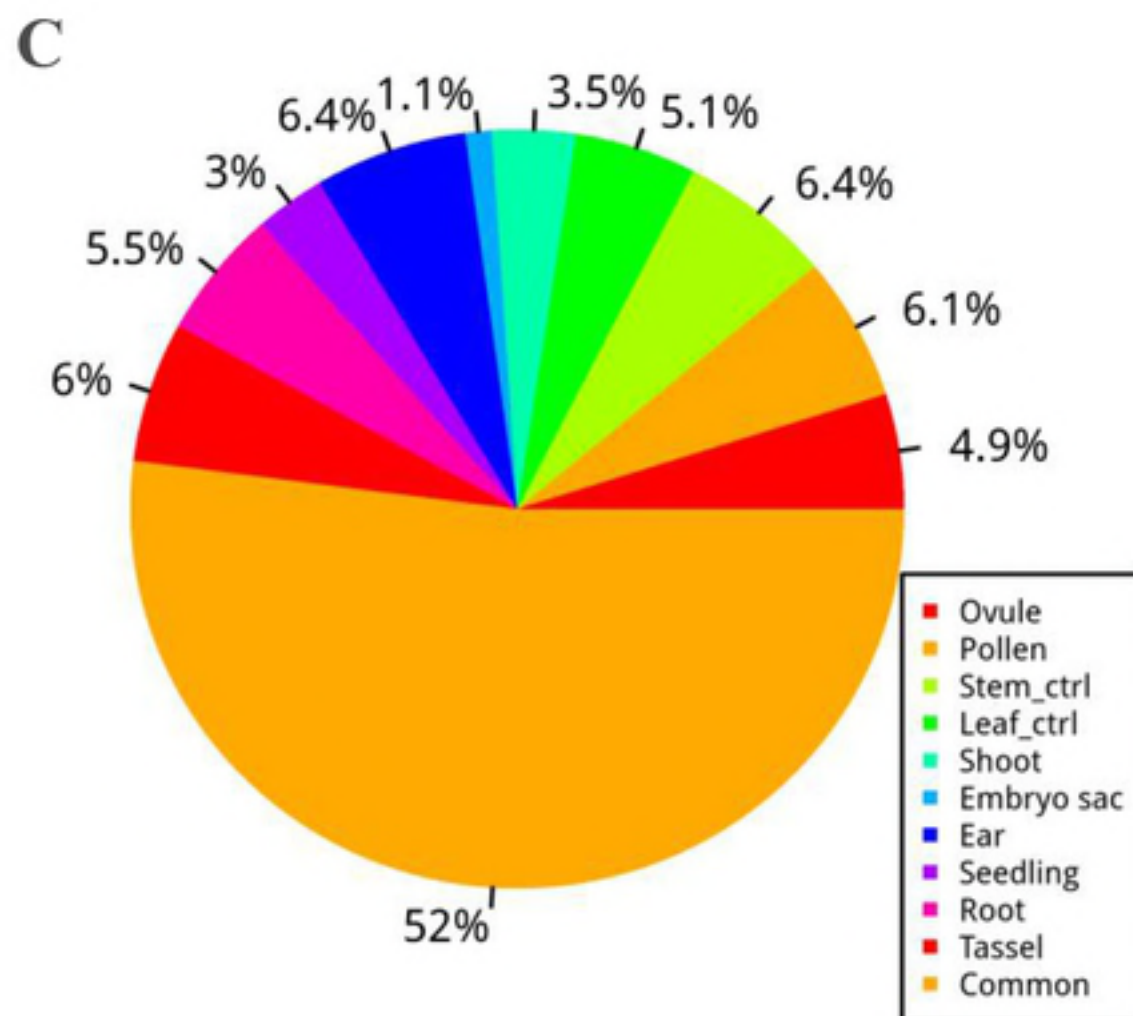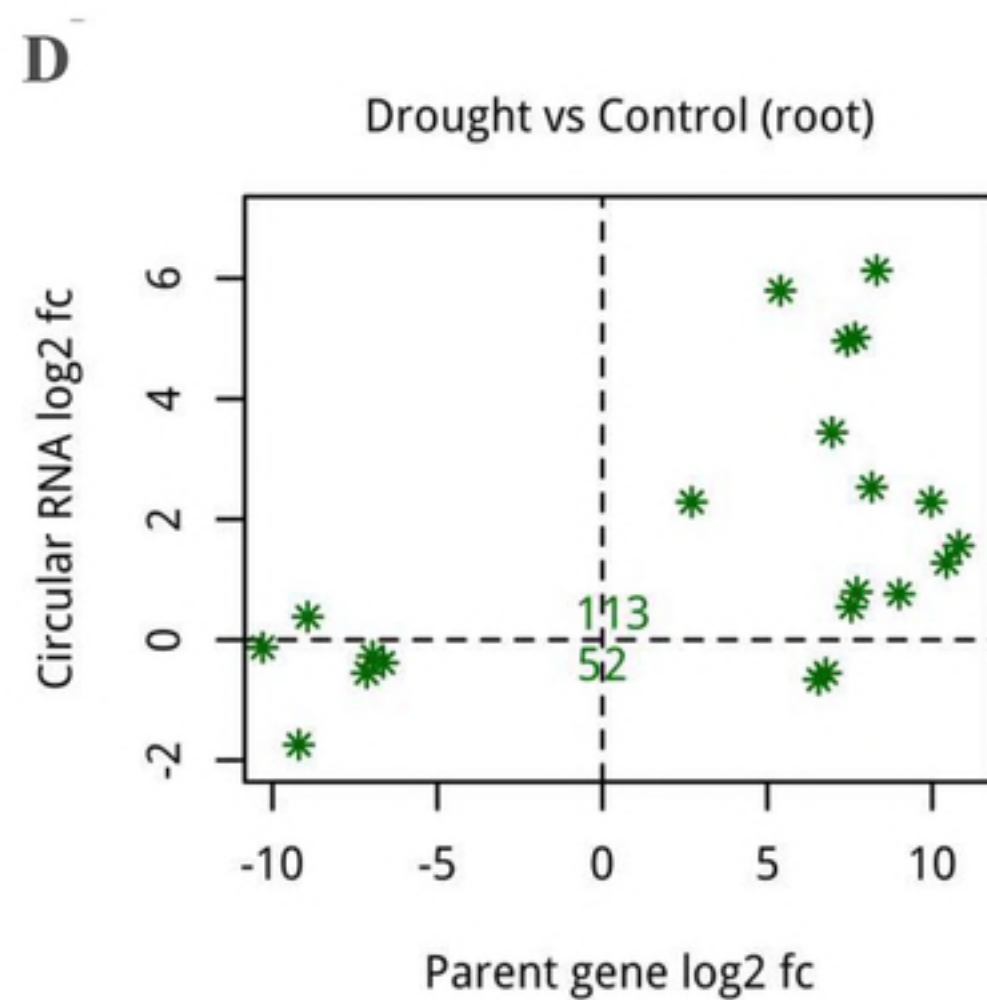





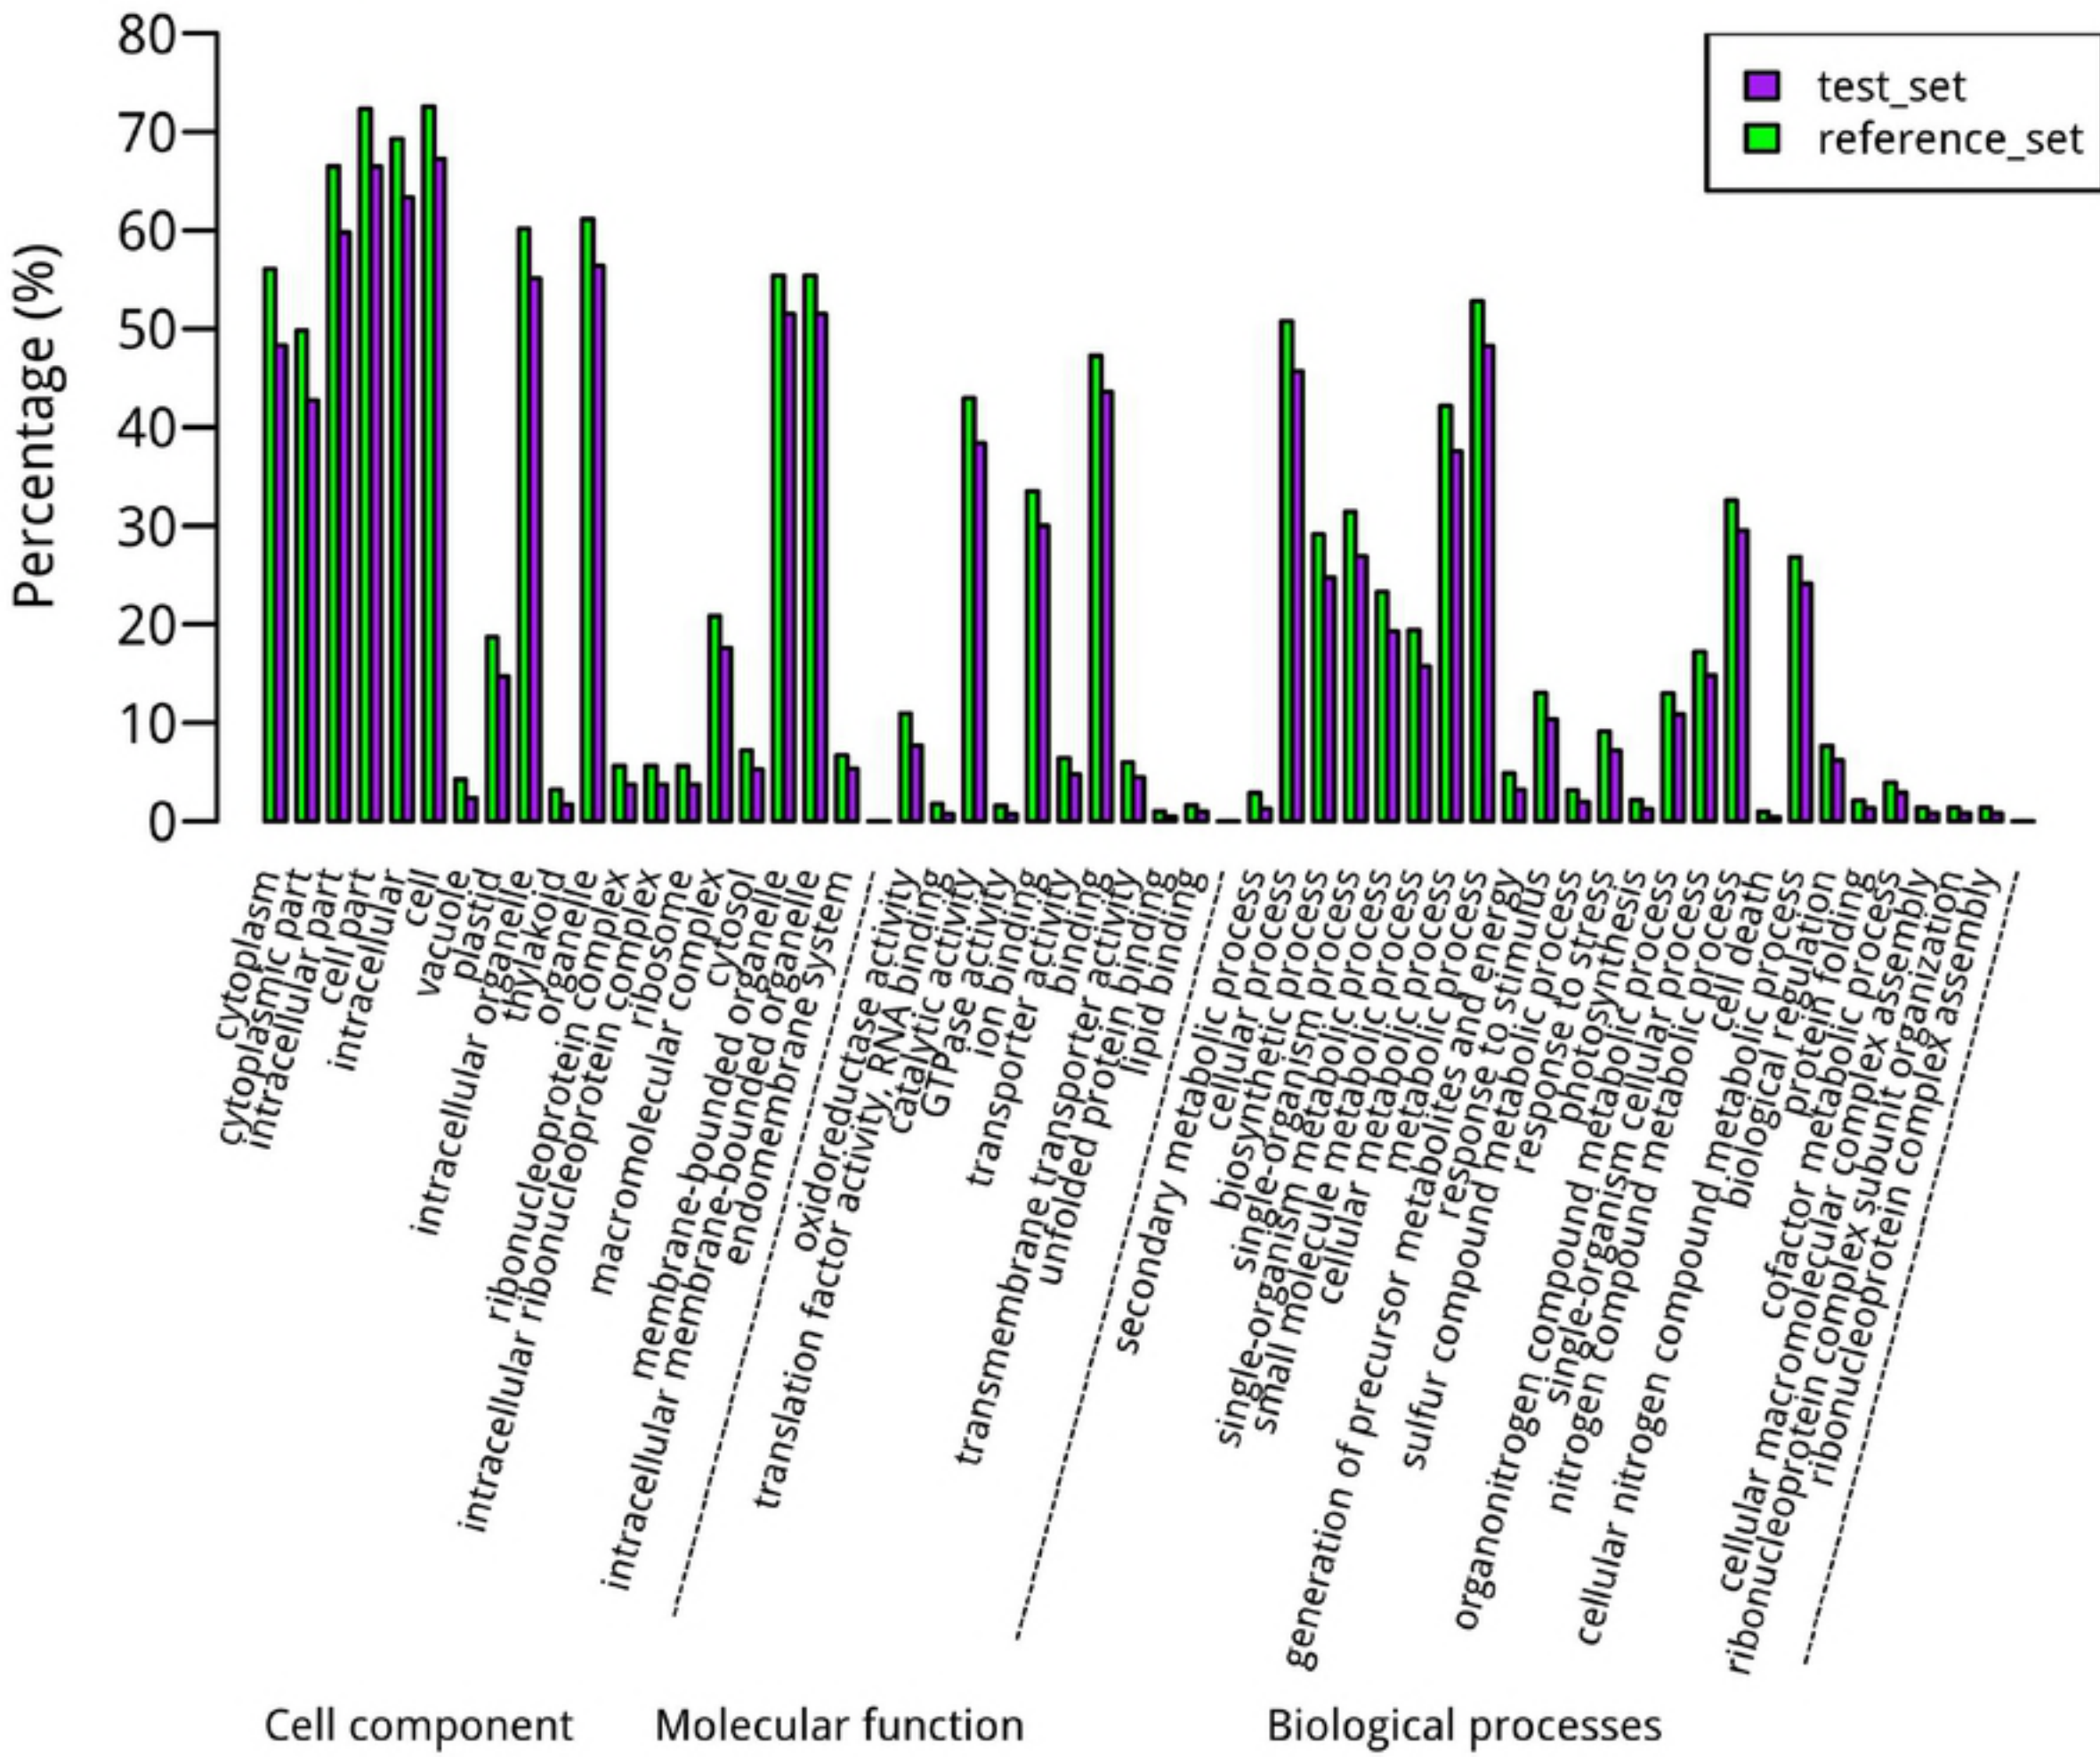

Source: https://www.biorxiv.org/content/10.1101/384693v1.full.pdf
